# Supplementary material for: ”Som att tala till en vägg” Intensivvårdssjuksköterskans upplevelser av kommunikation med sederade patienter
Source: eLife journal article supplement (doi:10.7554/elife.26439), 2010-03-08
Supplement: supp [file elife-26439-supp-v1.zip › elife_poa_e26439_Figure_4_source_data_1.xlsx]

## Sheet: S1-Legend
Figure 4-source data 1. Global protein changes in WT and KO mice by quantitative proteomics.
Unbiased quantitative proteomics was performed in WT and Klhl41 KO hindlimb muscle at P0 (n=3 per genotype). Muscle samples from were labeled with tandem mass tags (TMT). TMT129-131 were used to label WT samples and TMT126-128 were used to label KO samples. Data are provided as protein intensities (blue columns): for each channel the signal of each unique peptide was added and normalized to the 1…
Additional details indicated in Materials and methods.

## Sheet: Table S1
Protein Name	Protein accession (UNIPROT_ID)	WT-1 TMT-129	WT-2 TMT-130	WT-3 TMT-131	KO-1 TMT-126	KO-2 TMT-127	KO-3 TMT-128	ttest	fold change in KO
Kelch-like protein 41 OS=Mus musculus GN=Klhl41 PE=1 SV=1	KLH41_MOUSE	1.31649e+07	1.09217e+07	1.1188e+07	1324230	1.39199e+06	1.55336e+06	1.4383e-05	-8.26185
Protein Neb OS=Mus musculus GN=Neb PE=1 SV=1	E9Q1W3_MOUSE	1.95141e+08	1.61655e+08	1.82037e+08	95884569	8.30524e+07	9.17829e+07	0.000791643	-1.99037
Glutaredoxin-related protein 5, mitochondrial OS=Mus musculus GN=Glrx5 PE=1 SV=2	GLRX5_MOUSE	2.49302e+06	1.73539e+06	1.97473e+06	1424990	812154	909859	0.0345225	-1.97113
40S ribosomal protein S15 OS=Mus musculus GN=Rps15 PE=1 SV=2	RS15_MOUSE	790054	679084	451211	377000	362534	241227	0.0403549	-1.95802
Selenoprotein S OS=Mus musculus GN=Vimp PE=1 SV=3	SELS_MOUSE	274925	218070	315491	168850	133096	161365	0.0175191	-1.74502
ADP-ribosylation factor 4 OS=Mus musculus GN=Arf4 PE=1 SV=2	ARF4_MOUSE	3.3538e+06	3.65433e+06	3.07645e+06	2142800	2.05381e+06	1.58311e+06	0.01307	-1.74482
Troponin T, cardiac muscle OS=Mus musculus GN=Tnnt2 PE=1 SV=2	TNNT2_MOUSE	2.33342e+06	2.26147e+06	1.93557e+06	1366680	1.16996e+06	1.22504e+06	0.00209807	-1.73605
Transforming growth factor-beta-induced protein ig-h3 OS=Mus musculus GN=Tgfbi PE=1 SV=1	BGH3_MOUSE	3.0521e+06	4.26894e+06	3.13979e+06	2058400	2.27453e+06	1.90561e+06	0.02593	-1.67681
Fibromodulin OS=Mus musculus GN=Fmod PE=2 SV=1	FMOD_MOUSE	3.1225e+06	4.04648e+06	2.74608e+06	2084200	2.17356e+06	1.65919e+06	0.0262213	-1.6757
Transformer-2 protein homolog beta OS=Mus musculus GN=Tra2b PE=1 SV=1	TRA2B_MOUSE	1.15043e+06	914918	826200	671060	572715	487380	0.0191688	-1.6703
Ubiquitin-fold modifier 1 OS=Mus musculus GN=Ufm1 PE=1 SV=1	UFM1_MOUSE	182190	181382	164423	125200	108072	83605.7	0.0388574	-1.66624
Copper transport protein ATOX1 OS=Mus musculus GN=Atox1 PE=1 SV=1	ATOX1_MOUSE	2.20106e+06	2.026e+06	1.85158e+06	1438020	1.29569e+06	940796	0.0417708	-1.65427
Growth arrest-specific protein 1 OS=Mus musculus GN=Gas1 PE=2 SV=2	GAS1_MOUSE	150495	134887	135523	81670	89189.2	86128.7	0.000607523	-1.63784
Tenomodulin OS=Mus musculus GN=Tnmd PE=2 SV=1	TNMD_MOUSE	538176	450103	360330	310400	319010	224665	0.0479614	-1.57903
Ribonuclease 4 OS=Mus musculus GN=Rnase4 PE=1 SV=1	RNAS4_MOUSE	627631	789767	622018	444950	437448	440363	0.0314975	-1.54179
Cysteine-rich protein 1 OS=Mus musculus GN=Crip1 PE=1 SV=2	CRIP1_MOUSE	3.04009e+06	2.91662e+06	2.42036e+06	1766100	1.84765e+06	1.84649e+06	0.0223468	-1.53419
Ras-related protein Rab-4A OS=Mus musculus GN=Rab4a PE=1 SV=2	RAB4A_MOUSE	49389.9	41159	36254.3	26620	34003.5	22819.3	0.048032	-1.51964
TraB domain-containing protein OS=Mus musculus GN=Trabd PE=1 SV=1	TRABD_MOUSE	65221.8	68507	77513.9	46100	43366.5	49995.8	0.00380051	-1.51469
Cofilin-1 OS=Mus musculus GN=Cfl1 PE=1 SV=3	COF1_MOUSE	3.43574e+07	3.3629e+07	3.22674e+07	22661440	2.40801e+07	2.07149e+07	0.00531176	-1.4862
Serpin H1 OS=Mus musculus GN=Serpinh1 PE=1 SV=3	SERPH_MOUSE	4.91949e+07	6.54653e+07	6.23062e+07	38842119	4.30329e+07	3.7377e+07	0.0308438	-1.48397
40S ribosomal protein SA OS=Mus musculus GN=Rpsa PE=1 SV=4	RSSA_MOUSE	8.92991e+06	7.74362e+06	7.98189e+06	6293862	5.2289e+06	5.09178e+06	0.0110789	-1.48397
Probable ATP-dependent RNA helicase DDX49 OS=Mus musculus GN=Ddx49 PE=2 SV=1	DDX49_MOUSE	1.21203e+06	998144	885821	803700	655508	645849	0.0324429	-1.47074
Troponin T, slow skeletal muscle OS=Mus musculus GN=Tnnt1 PE=2 SV=3	TNNT1_MOUSE	5.86816e+06	5.33477e+06	4.77091e+06	4071710	3.27415e+06	3.6854e+06	0.0130703	-1.44805
Mammalian ependymin-related protein 1 OS=Mus musculus GN=Epdr1 PE=1 SV=1	EPDR1_MOUSE	106650	90943.7	108677	79100	67093.3	67908.6	0.00998886	-1.43049
DNA polymerase beta OS=Mus musculus GN=Polb PE=1 SV=3	DPOLB_MOUSE	61102.2	59845.4	72742.3	39680	49634.7	48096.5	0.0216699	-1.40956
Metalloproteinase inhibitor 2 OS=Mus musculus GN=Timp2 PE=1 SV=2	TIMP2_MOUSE	228007	234463	222101	168400	178909	143284	0.0309236	-1.39539
Myosin light chain 3 OS=Mus musculus GN=Myl3 PE=1 SV=4	MYL3_MOUSE	1.17029e+07	1.17267e+07	1.32656e+07	9697320	7.26461e+06	9.35804e+06	0.0475738	-1.39419
Four and a half LIM domains protein 2 OS=Mus musculus GN=Fhl2 PE=1 SV=1	FHL2_MOUSE	563934	638769	642617	481570	467787	379149	0.028398	-1.38902
Tetranectin OS=Mus musculus GN=Clec3b PE=1 SV=2	TETN_MOUSE	1.95742e+06	2.13779e+06	2.24511e+06	1452500	1.55673e+06	1.56495e+06	0.00456798	-1.38611
Thioredoxin domain-containing protein 12 OS=Mus musculus GN=Txndc12 PE=1 SV=1	TXD12_MOUSE	1.14473e+06	982855	1.08603e+06	886500	759651	678528	0.0315373	-1.38239
Ras-related protein Rab-8B OS=Mus musculus GN=Rab8b PE=1 SV=1	RAB8B_MOUSE	40542.3	42529.3	40386.4	25710	30771.2	33144.3	0.0440509	-1.37749
Cysteine and histidine-rich domain-containing protein 1 OS=Mus musculus GN=Chordc1 PE=1 SV=1	CHRD1_MOUSE	113734	117628	115970	90340	81987.7	81957.7	0.00661465	-1.36591
Myozenin-3 OS=Mus musculus GN=Myoz3 PE=1 SV=1	MYOZ3_MOUSE	304055	267732	272252	211760	194255	218557	0.00506195	-1.35139
Tropomyosin beta chain OS=Mus musculus GN=Tpm2 PE=1 SV=1	TPM2_MOUSE	3.02562e+08	2.42961e+08	2.7141e+08	235410480	1.78552e+08	1.9153e+08	0.0479262	-1.3492
Troponin I, slow skeletal muscle OS=Mus musculus GN=Tnni1 PE=1 SV=3	TNNI1_MOUSE	2.19151e+07	2.0701e+07	1.83807e+07	17144080	1.36663e+07	1.44918e+07	0.0276597	-1.34644
Coatomer subunit zeta-1 OS=Mus musculus GN=Copz1 PE=1 SV=1	COPZ1_MOUSE	715631	737401	706381	584770	529692	496281	0.0194351	-1.34063
Procollagen-lysine,2-oxoglutarate 5-dioxygenase 1 OS=Mus musculus GN=Plod1 PE=1 SV=1	PLOD1_MOUSE	1.62354e+06	1.74069e+06	1.50781e+06	1223410	1.23906e+06	1.17195e+06	0.0107163	-1.34053
Glutathione S-transferase A4 OS=Mus musculus GN=Gsta4 PE=1 SV=3	GSTA4_MOUSE	232473	218092	190987	174800	152677	151477	0.0187903	-1.33949
Methylosome protein 50 OS=Mus musculus GN=Wdr77 PE=1 SV=1	MEP50_MOUSE	475111	430414	425140	372500	308792	312711	0.0214715	-1.33869
Acetyl-CoA acetyltransferase, cytosolic OS=Mus musculus GN=Acat2 PE=1 SV=2	THIC_MOUSE	936692	895784	952451	723140	703512	654154	0.00247471	-1.33839
Selenocysteine lyase OS=Mus musculus GN=Scly PE=1 SV=1	SCLY_MOUSE	34181.8	36940	39255	29810	26487.6	26683.1	0.00677841	-1.33015
60S ribosomal protein L22-like 1 OS=Mus musculus GN=Rpl22l1 PE=1 SV=1	RL22L_MOUSE	124869	127833	117015	95290	102993	79788.5	0.0491668	-1.32957
Ubiquitin-conjugating enzyme E2 B OS=Mus musculus GN=Ube2b PE=1 SV=1	UBE2B_MOUSE	753016	638625	643010	578870	499314	454962	0.0352817	-1.32711
Thrombospondin-3 OS=Mus musculus GN=Thbs3 PE=1 SV=2	TSP3_MOUSE	532863	613527	557097	396000	419419	469700	0.0132071	-1.32555
cAMP-regulated phosphoprotein 19 OS=Mus musculus GN=Arpp19 PE=1 SV=2	ARP19_MOUSE	1.51958e+06	1.39207e+06	1.52458e+06	1228000	1.02148e+06	1.10708e+06	0.0174905	-1.32166
Serpin B6 OS=Mus musculus GN=Serpinb6 PE=1 SV=1	SPB6_MOUSE	869091	950004	978596	737610	672800	716672	0.00454394	-1.31527
Ubiquitin-like-conjugating enzyme ATG3 OS=Mus musculus GN=Atg3 PE=1 SV=1	ATG3_MOUSE	74377.5	63920.2	76284.1	56560	52041.8	54706.8	0.0249178	-1.31397
U6 snRNA-associated Sm-like protein LSm8 OS=Mus musculus GN=Lsm8 PE=1 SV=3	LSM8_MOUSE	156702	197105	174631	139800	125168	138070	0.0367838	-1.31114
Transforming growth factor beta-1-induced transcript 1 protein OS=Mus musculus GN=Tgfb1i1 PE=1 SV=2	TGFI1_MOUSE	156317	175541	151388	125000	110823	134253	0.0219783	-1.3058
Glypican-6 OS=Mus musculus GN=Gpc6 PE=1 SV=1	GPC6_MOUSE	260887	302256	293798	205490	215830	235641	0.0120526	-1.3044
1-phosphatidylinositol 4,5-bisphosphate phosphodiesterase delta-1 OS=Mus musculus GN=Plcd1 PE=1 SV=2	PLCD1_MOUSE	427607	484468	509184	344180	371769	375425	0.0204008	-1.30227
Dihydropyrimidinase-related protein 3 OS=Mus musculus GN=Dpysl3 PE=1 SV=1	DPYL3_MOUSE	6.82139e+06	6.37541e+06	6.21891e+06	5134510	4.79222e+06	5.01154e+06	0.00222205	-1.29973
Complement component 1 Q subcomponent-binding protein, mitochondrial OS=Mus musculus GN=C1qbp PE=1 SV=1	C1QBP_MOUSE	2.55076e+06	2.39041e+06	2.07413e+06	1916040	1.85055e+06	1.6311e+06	0.0311392	-1.29969
Troponin C, slow skeletal and cardiac muscles OS=Mus musculus GN=Tnnc1 PE=1 SV=1	TNNC1_MOUSE	8.75429e+06	7.53064e+06	7.36997e+06	6832666	5.33495e+06	6.14333e+06	0.0493076	-1.29184
Olfactomedin-like protein 3 OS=Mus musculus GN=Olfml3 PE=2 SV=2	OLFL3_MOUSE	424750	509458	527459	370400	403012	360677	0.0458993	-1.28885
Death-associated protein 1 OS=Mus musculus GN=Dap PE=1 SV=3	DAP1_MOUSE	770203	914773	937989	753730	649908	640905	0.0387974	-1.28291
Inorganic pyrophosphatase OS=Mus musculus GN=Ppa1 PE=1 SV=1	IPYR_MOUSE	1.34921e+06	1.65263e+06	1.53134e+06	1113320	1.19555e+06	1.23506e+06	0.0352903	-1.27914
Multiple coagulation factor deficiency protein 2 homolog OS=Mus musculus GN=Mcfd2 PE=1 SV=1	MCFD2_MOUSE	1.21126e+06	1.41067e+06	1.21221e+06	1005000	1.09251e+06	904021	0.0306217	-1.27739
Protein disulfide-isomerase A5 OS=Mus musculus GN=Pdia5 PE=1 SV=1	PDIA5_MOUSE	561277	669709	683766	476200	529358	495582	0.04291	-1.27553
Phosphoribosyl pyrophosphate synthase-associated protein 1 OS=Mus musculus GN=Prpsap1 PE=1 SV=1	KPRA_MOUSE	308968	302847	311790	260100	239263	224981	0.024407	-1.27509
Cytosolic 5'-nucleotidase 3A OS=Mus musculus GN=Nt5c3a PE=1 SV=4	5NT3A_MOUSE	747702	709736	715617	590900	552643	561033	0.000907165	-1.27484
Serine/threonine-protein phosphatase 6 catalytic subunit OS=Mus musculus GN=Ppp6c PE=1 SV=1	PPP6_MOUSE	760023	708870	778952	630100	545569	594829	0.0123511	-1.26961
C-terminal-binding protein 2 OS=Mus musculus GN=Ctbp2 PE=1 SV=2	CTBP2_MOUSE	426907	416278	382958	298800	335712	333957	0.00974452	-1.26606
NADH dehydrogenase [ubiquinone] iron-sulfur protein 4, mitochondrial OS=Mus musculus GN=Ndufs4 PE=1 SV=3	NDUS4_MOUSE	2.18412e+06	1.84145e+06	2.05147e+06	1725000	1.44527e+06	1.64995e+06	0.0335781	-1.26074
Nitric oxide synthase-interacting protein OS=Mus musculus GN=Nosip PE=1 SV=1	NOSIP_MOUSE	92866	98444.2	79616.9	76920	67682.8	70850.7	0.0487575	-1.25747
ATP synthase subunit beta, mitochondrial OS=Mus musculus GN=Atp5b PE=1 SV=2	ATPB_MOUSE	6.12237e+07	5.39411e+07	5.31798e+07	46002506	4.22386e+07	4.62593e+07	0.0189791	-1.25163
Spermidine synthase OS=Mus musculus GN=Srm PE=1 SV=1	SPEE_MOUSE	3.20958e+06	3.69957e+06	3.32249e+06	2924810	2.73237e+06	2.52458e+06	0.0207254	-1.25054
Haloacid dehalogenase-like hydrolase domain-containing protein 2 OS=Mus musculus GN=Hdhd2 PE=1 SV=2	HDHD2_MOUSE	168483	153760	159381	123900	131259	130250	0.00361112	-1.24965
Myeloid-associated differentiation marker OS=Mus musculus GN=Myadm PE=1 SV=2	MYADM_MOUSE	2.15823e+06	1.9423e+06	1.82083e+06	1704450	1.59708e+06	1.43797e+06	0.0336114	-1.24936
DNA mismatch repair protein Mlh1 OS=Mus musculus GN=Mlh1 PE=1 SV=2	MLH1_MOUSE	58322.3	67706.5	63850.9	72680	78195.3	85989.1	0.0282809	1.24744
Ras-related protein Rab-1B OS=Mus musculus GN=Rab1b PE=1 SV=1	RAB1B_MOUSE	1.30898e+06	1.45899e+06	1.45642e+06	1668860	1.80226e+06	1.79929e+06	0.00951931	1.24761
40S ribosomal protein S2 OS=Mus musculus GN=Rps2 PE=1 SV=3	RS2_MOUSE	7.8457e+06	8.54966e+06	8.60534e+06	10541960	1.02432e+07	1.04765e+07	0.0119207	1.25043
Synaptopodin 2-like protein OS=Mus musculus GN=Synpo2l PE=1 SV=1	SYP2L_MOUSE	4.85113e+06	4.63146e+06	5.03105e+06	6423050	5.74452e+06	5.98262e+06	0.00677154	1.25056
BAG family molecular chaperone regulator 3 OS=Mus musculus GN=Bag3 PE=1 SV=2	BAG3_MOUSE	3.89221e+06	4.015e+06	4.41511e+06	5454357	4.62428e+06	5.33622e+06	0.0293854	1.25097
Autophagy-related protein 16-1 OS=Mus musculus GN=Atg16l1 PE=1 SV=1	A16L1_MOUSE	92635	112363	105664	141200	117602	130529	0.0440518	1.25323
Nucleolar GTP-binding protein 1 OS=Mus musculus GN=Gtpbp4 PE=1 SV=3	NOG1_MOUSE	1.18492e+06	1.28313e+06	1.34622e+06	1637190	1.56281e+06	1.58314e+06	0.016308	1.25401
Dipeptidase 1 OS=Mus musculus GN=Dpep1 PE=1 SV=2	DPEP1_MOUSE	40280.4	43625.5	46695.3	56120	56531.7	51597.2	0.0148187	1.25764
Mitochondrial import receptor subunit TOM5 homolog OS=Mus musculus GN=Tomm5 PE=3 SV=1	TOM5_MOUSE	809151	757479	719430	1000000	896805	980644	0.00853716	1.25869
Bromodomain-containing protein 8 OS=Mus musculus GN=Brd8 PE=1 SV=2	BRD8_MOUSE	35891.3	36153.9	36463.4	46790	47984.2	42221.8	0.0260322	1.26254
Non-histone chromosomal protein HMG-17 OS=Mus musculus GN=Hmgn2 PE=1 SV=2	HMGN2_MOUSE	3.44069e+06	3.90899e+06	3.62584e+06	4624110	4.86777e+06	4.42159e+06	0.00832416	1.26768
60S ribosomal protein L37 OS=Mus musculus GN=Rpl37 PE=3 SV=3	RL37_MOUSE	1.53863e+06	1.69282e+06	1.43609e+06	2010800	2.17118e+06	1.76777e+06	0.0369135	1.27471
Nucleolar complex protein 2 homolog OS=Mus musculus GN=Noc2l PE=1 SV=2	NOC2L_MOUSE	33226.9	30413.1	36143.7	40340	40664.7	47668.3	0.0265852	1.28952
Phosphofurin acidic cluster sorting protein 2 OS=Mus musculus GN=Pacs2 PE=1 SV=2	PACS2_MOUSE	60332.1	61980.2	56521.3	77100	73754.5	79816.4	0.00228453	1.28986
Thiamine-triphosphatase OS=Mus musculus GN=Thtpa PE=1 SV=3	THTPA_MOUSE	112694	128951	121514	147120	145131	177527	0.0384042	1.29359
Pantothenate kinase 4 OS=Mus musculus GN=Pank4 PE=1 SV=2	PANK4_MOUSE	57013.3	61886.4	63445.1	77580	75611.4	83084.3	0.0039855	1.29576
U3 small nucleolar RNA-associated protein 6 homolog OS=Mus musculus GN=Utp6 PE=2 SV=1	UTP6_MOUSE	27259.2	23691.5	25272.3	34530	30083.4	34410.5	0.0130529	1.29914
Equilibrative nucleoside transporter 1 OS=Mus musculus GN=Slc29a1 PE=1 SV=3	S29A1_MOUSE	38894.4	45435.8	49683.7	55900	61837.1	56522.3	0.0478169	1.30031
40S ribosomal protein S8 OS=Mus musculus GN=Rps8 PE=1 SV=2	RS8_MOUSE	1.1542e+07	1.35413e+07	1.35802e+07	16223450	1.73179e+07	1.68023e+07	0.0276744	1.3021
Importin subunit alpha-3 OS=Mus musculus GN=Kpna4 PE=1 SV=1	IMA3_MOUSE	428131	471118	448223	520430	602474	635003	0.0311342	1.3046
Ras-specific guanine nucleotide-releasing factor RalGPS2 OS=Mus musculus GN=Ralgps2 PE=1 SV=2	RGPS2_MOUSE	37285	46322.8	38148.2	49750	49949.1	59222.2	0.0420963	1.30524
ADP-ribosylation factor GTPase-activating protein 2 OS=Mus musculus GN=Arfgap2 PE=1 SV=1	ARFG2_MOUSE	647467	679048	698732	931530	879297	868735	0.000830708	1.32308
cAMP-dependent protein kinase inhibitor alpha OS=Mus musculus GN=Pkia PE=1 SV=2	IPKA_MOUSE	265200	278528	313229	382700	335712	420170	0.028946	1.32863
Alpha-crystallin B chain OS=Mus musculus GN=Cryab PE=1 SV=2	CRYAB_MOUSE	1.49916e+07	1.63619e+07	1.77172e+07	24063650	1.9269e+07	2.18856e+07	0.0278188	1.32907
Synaptopodin-2 OS=Mus musculus GN=Synpo2 PE=1 SV=2	SYNP2_MOUSE	4.62636e+06	4.05596e+06	4.46505e+06	6495390	5.15769e+06	5.86193e+06	0.0308148	1.33221
60S ribosomal protein L13 OS=Mus musculus GN=Rpl13 PE=1 SV=3	RL13_MOUSE	5.10772e+06	6.36685e+06	6.319e+06	7655960	8.40931e+06	7.65085e+06	0.0401383	1.33285
Tyrosine-protein phosphatase non-receptor type 21 OS=Mus musculus GN=Ptpn21 PE=1 SV=1	PTN21_MOUSE	75101.4	82469.5	77932.1	97650	103455	115167	0.0116388	1.34296
Centriolin OS=Mus musculus GN=Cntrl PE=1 SV=2	CNTRL_MOUSE	116429	118061	122598	168600	157393	153618	0.00228236	1.34312
EMILIN-3 OS=Mus musculus GN=Emilin3 PE=2 SV=1	EMIL3_MOUSE	646528	686801	633541	828310	1.00129e+06	812530	0.0362695	1.34332
NF-kappa-B-activating protein OS=Mus musculus GN=Nkap PE=2 SV=1	NKAP_MOUSE	105572	106594	99625.6	139900	141673	137698	0.00193564	1.34472
DNA helicase INO80 OS=Mus musculus GN=Ino80 PE=1 SV=2	INO80_MOUSE	117892	125561	137245	166700	191288	155480	0.0200173	1.34875
Phytanoyl-CoA dioxygenase domain-containing protein 1 OS=Mus musculus GN=Phyhd1 PE=1 SV=2	PHYD1_MOUSE	60224.3	63379.3	67503.4	84480	79718.2	94405.5	0.0103548	1.35319
Charged multivesicular body protein 3 OS=Mus musculus GN=Chmp3 PE=1 SV=3	CHMP3_MOUSE	287761	358870	331430	422200	419518	482455	0.0221378	1.35387
Kinesin-like protein KIF14 OS=Mus musculus GN=Kif14 PE=1 SV=1	KIF14_MOUSE	15570.1	13998.5	13810.6	18180	19364.6	21860.4	0.0118177	1.36943
Syndetin OS=Mus musculus GN=Vps50 PE=1 SV=2	VPS50_MOUSE	30878.3	35973.6	38246.6	43590	50715.4	49651.3	0.0189949	1.36973
E3 ubiquitin-protein ligase Praja-2 OS=Mus musculus GN=Pja2 PE=1 SV=2	PJA2_MOUSE	29084.2	36896.7	31408.9	41030	46805.2	46439.3	0.0241838	1.37873
Uncharacterized protein C11orf98 homolog OS=Mus musculus PE=1 SV=1	CK098_MOUSE	42667.6	45479	46978.1	55990	59754.2	71465.1	0.0345123	1.38546
60S ribosomal protein L35a OS=Mus musculus GN=Rpl35a PE=1 SV=2	RL35A_MOUSE	468997	561485	531677	719920	790835	654656	0.0128647	1.38617
High mobility group protein HMG-I/HMG-Y OS=Mus musculus GN=Hmga1 PE=1 SV=4	HMGA1_MOUSE	2.08217e+06	2.51007e+06	2.01148e+06	2973800	3.49202e+06	2.7156e+06	0.0310773	1.39034
[Protein ADP-ribosylarginine] hydrolase-like protein 1 OS=Mus musculus GN=Adprhl1 PE=1 SV=1	ARHL1_MOUSE	896920	808901	944420	1344330	1.08682e+06	1.2607e+06	0.0161382	1.39302
Transmembrane protein 41B OS=Mus musculus GN=Tmem41b PE=1 SV=1	TM41B_MOUSE	64775.2	69430.2	60272.2	88140	89238.3	94777.9	0.00483725	1.39942
Carboxypeptidase N subunit 2 OS=Mus musculus GN=Cpn2 PE=1 SV=2	CPN2_MOUSE	46132.7	58698.7	57271.5	76440	79914.6	70804.1	0.0304107	1.40132
MORC family CW-type zinc finger protein 3 OS=Mus musculus GN=Morc3 PE=1 SV=1	MORC3_MOUSE	55326.9	61864.8	64453.5	83070	89199.1	84294.6	0.0073522	1.41244
Heat shock protein beta-1 OS=Mus musculus GN=Hspb1 PE=1 SV=3	HSPB1_MOUSE	5.1635e+07	4.51785e+07	4.9393e+07	78932090	5.93498e+07	6.85619e+07	0.035891	1.41474
Metal-response element-binding transcription factor 2 OS=Mus musculus GN=Mtf2 PE=1 SV=2	MTF2_MOUSE	1.12255e+06	1.30199e+06	1.35376e+06	1849500	1.75893e+06	1.7506e+06	0.0180848	1.41837
Transcription factor HES-1 OS=Mus musculus GN=Hes1 PE=1 SV=1	HES1_MOUSE	349772	438765	376784	484050	606954	582028	0.0199779	1.43568
Heterochromatin protein 1-binding protein 3 OS=Mus musculus GN=Hp1bp3 PE=1 SV=1	HP1B3_MOUSE	1.56802e+06	1.95302e+06	2.21129e+06	2399900	2.70112e+06	3.15625e+06	0.0479925	1.44047
Lipopolysaccharide-responsive and beige-like anchor protein OS=Mus musculus GN=Lrba PE=1 SV=1	LRBA_MOUSE	47518.8	44462.1	56066.3	61090	84188.4	68979.3	0.0388203	1.44723
Histidine decarboxylase OS=Mus musculus GN=Hdc PE=1 SV=2	DCHS_MOUSE	306150	412196	375825	471630	641213	479690	0.0494751	1.45547
Patatin-like phospholipase domain-containing protein 2 OS=Mus musculus GN=Pnpla2 PE=1 SV=1	PLPL2_MOUSE	54379.8	73418.4	65646.4	92690	87656.6	102505	0.029626	1.46219
Xin actin-binding repeat-containing protein 1 OS=Mus musculus GN=Xirp1 PE=1 SV=2	XIRP1_MOUSE	1.16816e+07	1.19175e+07	1.10843e+07	19310713	1.48191e+07	1.6784e+07	0.0307658	1.46796
Chymase OS=Mus musculus GN=Cma1 PE=1 SV=2	CMA1_MOUSE	703864	962445	863475	1109180	1.379e+06	1.2386e+06	0.0297863	1.47316
60S ribosomal protein L7 OS=Mus musculus GN=Rpl7 PE=1 SV=2	RL7_MOUSE	1.30278e+07	1.84927e+07	1.7041e+07	24668700	2.62488e+07	2.26974e+07	0.0421361	1.51591
Alpha-protein kinase 3 OS=Mus musculus GN=Alpk3 PE=1 SV=1	ALPK3_MOUSE	1.26312e+06	1.26585e+06	1.48884e+06	1996030	1.82084e+06	2.31611e+06	0.0104193	1.52645
Pancreatic alpha-amylase OS=Mus musculus GN=Amy2 PE=1 SV=2	AMYP_MOUSE	15262.1	14164.4	13281.8	21390	21575.2	22661	0.00313464	1.53662
FAD-dependent oxidoreductase domain-containing protein 1 OS=Mus musculus GN=Foxred1 PE=1 SV=1	FXRD1_MOUSE	57775.6	65968.4	77218.8	90500	96341.7	122895	0.0269351	1.54126
Ecto-ADP-ribosyltransferase 3 OS=Mus musculus GN=Art3 PE=1 SV=2	NAR3_MOUSE	206446	180661	143886	296200	263304	263851	0.0383215	1.55059
Histone H3.3 OS=Mus musculus GN=H3f3a PE=1 SV=2	H33_MOUSE,H3C_MOUSE	1.19301e+06	1.30877e+06	1.07533e+06	1956700	2.10496e+06	1.54708e+06	0.0219342	1.56795
Leiomodin-2 OS=Mus musculus GN=Lmod2 PE=1 SV=1	LMOD2_MOUSE	944153	939633	1.06196e+06	1610030	1.41556e+06	1.59356e+06	0.00144865	1.56807
Mast cell carboxypeptidase A OS=Mus musculus GN=Cpa3 PE=2 SV=1	CBPA3_MOUSE	2.39925e+06	3.42196e+06	2.99183e+06	4171670	5.37694e+06	4.32352e+06	0.0274379	1.57405
60S ribosomal protein L34 OS=Mus musculus GN=Rpl34 PE=1 SV=2	RL34_MOUSE	3.89573e+06	4.97724e+06	4.60685e+06	7535400	8.25251e+06	5.77894e+06	0.0284114	1.59994
Ribosomal L1 domain-containing protein 1 OS=Mus musculus GN=Rsl1d1 PE=1 SV=1	RL1D1_MOUSE	871416	1.26598e+06	1.17938e+06	1759800	1.8747e+06	1.78505e+06	0.0447079	1.63398
60S ribosomal protein L29 OS=Mus musculus GN=Rpl29 PE=2 SV=2	RL29_MOUSE	564812	700504	698978	1129530	1.12794e+06	999665	0.00720322	1.65817
Phosphoglucomutase-2 OS=Mus musculus GN=Pgm2 PE=1 SV=1	PGM2_MOUSE	1.06859e+06	1.44518e+06	1.35409e+06	2149190	2.14215e+06	2.20185e+06	0.0281596	1.67875
E3 ubiquitin-protein ligase TRIM63 OS=Mus musculus GN=Trim63 PE=1 SV=1	TRI63_MOUSE	49436.1	57328.4	64687.2	111400	77458.5	101667	0.0213312	1.69451
Ankyrin repeat domain-containing protein 2 OS=Mus musculus GN=Ankrd2 PE=1 SV=3	ANKR2_MOUSE	1.06294e+06	976912	1.27983e+06	2196800	1.53286e+06	1.89807e+06	0.018657	1.69526
Histone H1.0 OS=Mus musculus GN=H1f0 PE=2 SV=4	H10_MOUSE	3.83608e+06	5.33553e+06	5.28934e+06	7753600	1.03951e+07	6.57235e+06	0.0395066	1.7095
60S ribosomal protein L6 OS=Mus musculus GN=Rpl6 PE=1 SV=3	RL6_MOUSE	4.0945e+06	5.48119e+06	5.18379e+06	8378540	9.50831e+06	7.39634e+06	0.0103074	1.71301
Nebulin-related-anchoring protein OS=Mus musculus GN=Nrap PE=1 SV=3	NRAP_MOUSE	7.73914e+06	7.57227e+06	7.91788e+06	16648500	1.14226e+07	1.23743e+07	0.040517	1.74114
Xin actin-binding repeat-containing protein 2 OS=Mus musculus GN=Xirp2 PE=1 SV=1	XIRP2_MOUSE	3.30995e+06	3.58278e+06	3.82125e+06	7893230	5.6045e+06	6.33246e+06	0.0152956	1.85087
Coiled-coil domain-containing protein 70 OS=Mus musculus GN=Ccdc70 PE=2 SV=1	CCD70_MOUSE	61980	71305.3	82002.7	159400	115048	126526	0.00866735	1.8625
Paired mesoderm homeobox protein 2B OS=Mus musculus GN=Phox2b PE=1 SV=1	PHX2B_MOUSE	210681	280404	296872	408400	591746	617639	0.0146751	2.05314
60S ribosomal protein L24 OS=Mus musculus GN=Rpl24 PE=1 SV=2	RL24_MOUSE	1.8333e+06	3.06699e+06	2.80123e+06	4871000	6.34336e+06	4.86756e+06	0.0235026	2.08815
Centrobin OS=Mus musculus GN=Cntrob PE=2 SV=2	CNTRB_MOUSE	136050	231218	211143	297350	406215	509268	0.030587	2.09684
Ankyrin repeat domain-containing protein 1 OS=Mus musculus GN=Ankrd1 PE=1 SV=1	ANKR1_MOUSE	148763	187563	186326	475040	375090	371859	0.00157139	2.33805
E3 ubiquitin-protein ligase HERC2 OS=Mus musculus GN=Herc2 PE=1 SV=3	HERC2_MOUSE	322860	421918	451371	945300	760427	1.12665e+06	0.005098	2.36791
Histone H1.1 OS=Mus musculus GN=Hist1h1a PE=1 SV=2	H11_MOUSE	1.87515e+06	2.93053e+06	2.62846e+06	4881200	8.28071e+06	4.44618e+06	0.028434	2.36854
Myelin basic protein OS=Mus musculus GN=Mbp PE=1 SV=2	MBP_MOUSE	91942	138723	203863	354200	326673	417935	0.0411802	2.52874
Histone H1.2 OS=Mus musculus GN=Hist1h1c PE=1 SV=2	H12_MOUSE	5.01465e+06	7.83262e+06	8.75387e+06	17851300	2.68006e+07	1.13755e+07	0.0439541	2.59372
Guanine nucleotide-binding protein G(t) subunit alpha-1 OS=Mus musculus GN=Gnat1 PE=1 SV=3	GNAT1_MOUSE	79313.4	117917	99994.6	302400	250433	231638	0.00339186	2.63932
Histone H1.3 OS=Mus musculus GN=Hist1h1d PE=1 SV=2	H13_MOUSE	19166.1	39082	25260	87040	152087	74733	0.0116919	3.75844
