# Supplementary material for: ”Som att tala till en vägg” Intensivvårdssjuksköterskans upplevelser av kommunikation med sederade patienter
Source: eLife journal article supplement (doi:10.7554/elife.26439), 2010-03-08
Supplement: supp [file elife-26439-supp-v1.zip › elife_poa_e26439_Figure_4_source_data_2.xlsx]

## Sheet: S2-Legend
Figure 4-source data 2. Global mRNA changes in WT and KO mice by RNA-seq.
RNA-seq (n=3 mice per genotype) in WT and KO hindlimb muscle at P0 was performed by the UT Southwestern Genomic and Microarray Core Facility. Data are provided are log of fold change (log(2)FC) and log2 of counts per million (log(2)CPM). For analysis of multiple groups, Holm-Sidak correction for multiple comparisons was utilized with a false discovery rate of 0.05 (FDR). Gene transcripts with sig…

## Sheet: Table S2
id	log(2)FC	logCPM	PValue	FDR
Klhl41	-4.86586	8.42587	4.36008e-62	6.31252e-58
En2	3.66137	-0.285867	1.51615e-07	4.67037e-05
Greb1	3.16457	2.62497	3.01632e-07	8.08709e-05
Ankrd2	3.14221	8.36778	6.34731e-06	0.000988132
Ces5a	2.9502	3.28919	1.27486e-06	0.000261618
Sgpp2	2.94731	0.108247	0.000192739	0.0146098
Opn1mw	2.92357	0.185575	1.85398e-05	0.00234169
Shbg	2.7445	0.505362	0.000201106	0.0150861
Ankrd1	2.66409	7.43712	4.23746e-22	2.045e-18
Bcmo1	2.65952	0.170549	0.000136232	0.011401
BB123696	2.65088	2.33563	7.05774e-07	0.000161475
Gm5091	-2.64527	-0.300895	2.12969e-05	0.00265808
Gck	2.64173	-0.0495728	6.37133e-05	0.00623271
Zbtb16	2.61276	5.55765	2.73538e-07	7.69035e-05
Mir541	2.60372	1.25815	1.43084e-07	4.60348e-05
Aqp4	-2.59172	3.2373	6.36845e-05	0.00623271
Slc10a6	2.57888	3.71311	1.35733e-07	4.57011e-05
Fam107a	2.52995	2.26142	4.48925e-05	0.00497339
Gdf15	2.4917	-0.0464245	0.000517965	0.0300802
Plcd4	-2.46789	3.67665	1.74124e-11	1.40054e-08
Trim9	2.4503	1.4353	0.000420564	0.0260211
Mapt	2.41191	4.02621	0.000754517	0.0394365
Slc28a1	2.37651	-0.142846	0.000396642	0.0247525
Mettl11b	-2.32033	3.10795	1.20145e-10	7.56287e-08
Otog	2.27669	3.27287	3.56943e-09	1.78201e-06
Saa3	2.25697	-0.420653	0.000469423	0.028273
Igsf21	2.2421	0.933294	3.50952e-05	0.00406487
Mir496	2.24184	0.532765	0.000857455	0.043105
Fkbp5	2.23699	6.44309	1.26801e-18	4.58956e-15
Klhl34	2.19357	2.16673	7.92943e-05	0.00750342
Lin28a	-2.18846	-0.395931	0.00075888	0.0395218
Xirp2	2.13735	9.49706	1.46833e-06	0.000295257
E230008N13Rik	2.12939	-0.0661094	0.000499691	0.0295287
Ppara	2.12291	5.94726	2.64582e-08	1.09446e-05
Timp4	2.10319	3.72375	1.41421e-10	8.53124e-08
Klf15	2.09339	4.19547	2.4285e-07	7.32496e-05
Xirp1	2.08622	8.34676	1.80385e-06	0.000348216
Gnal	2.08389	2.07933	0.000401198	0.0249294
Ddit4l	-2.08371	4.01437	2.29519e-14	3.32298e-11
Scn4b	-2.07243	3.19291	7.14531e-07	0.000161475
Hrk	2.03258	0.389065	0.000956279	0.0472526
Mir369	1.97546	0.118396	0.000978705	0.0478706
Gcsam	1.97091	1.58586	8.35378e-06	0.00123414
Tmem125	1.96419	3.22137	0.000305013	0.0209288
Cnksr1	1.94978	3.84239	0.000496641	0.0294687
Atf3	1.92693	4.65037	1.87894e-18	5.44065e-15
Map3k6	1.92628	3.55803	2.43465e-05	0.00301273
Myh2	1.91507	6.61325	7.48031e-09	3.38437e-06
Tmem72	-1.90265	1.95161	4.3301e-05	0.00489775
Myh1	1.88804	8.07716	1.27414e-06	0.000261618
Xdh	1.88073	4.18329	0.000255533	0.0182247
Mlph	1.87781	2.1879	3.31925e-05	0.0038755
Mtus2	1.87315	5.39237	2.01186e-15	4.16111e-12
Paqr8	1.86328	3.52471	2.76211e-07	7.69035e-05
Mir409	1.8493	0.897654	0.00097764	0.0478706
Lingo3	-1.82804	2.1738	0.000849373	0.043105
Arrdc2	1.82361	3.86721	5.00869e-06	0.000805731
Hbegf	1.80804	4.73822	6.62606e-15	1.19915e-11
Ccdc69	-1.80011	2.97728	2.48614e-06	0.000445281
Mir134	1.79496	2.74792	9.17409e-05	0.00851427
Spon2	-1.79069	4.94386	4.76312e-06	0.000783641
Csrp3	1.76538	10.0364	1.47639e-10	8.55005e-08
Otud1	1.74165	5.6498	5.07707e-11	3.50028e-08
Hoga1	1.73453	4.63896	7.08382e-06	0.0010788
Hspa1l	1.73426	3.31354	5.6361e-05	0.00587046
Tmem233	-1.72951	2.9746	2.14978e-06	0.000404214
8430408G22Rik	1.72926	4.70031	1.041e-06	0.000224949
Mir453	1.71887	2.26055	0.00050463	0.0296993
Adrb2	1.70763	4.13961	1.41006e-07	4.60348e-05
Mettl21c	1.70393	6.63089	1.25243e-26	9.06634e-23
Mybph	1.69235	8.29324	5.74367e-08	2.24748e-05
Hspb7	1.68245	9.46215	9.49828e-05	0.00864882
Lmod2	1.67511	8.23686	1.90021e-09	1.01894e-06
Lrrc2	1.66764	5.79355	0.000141372	0.0116853
Rnf115	1.64591	7.39093	3.09755e-09	1.60166e-06
Mir382	1.62371	2.91243	0.000115237	0.00999041
Lmcd1	1.61605	8.09878	1.67413e-06	0.000332028
Glul	1.61572	7.70972	7.66396e-12	6.93493e-09
Ky	-1.60064	4.02117	9.77531e-11	6.43304e-08
Abra	1.59756	6.96239	2.94997e-12	2.84731e-09
Ankrd9	1.5899	5.56581	1.54528e-05	0.00201555
Lrrc38	-1.587	1.05993	0.000690541	0.037166
Gnao1	1.58222	4.04315	5.41268e-05	0.00572006
Il31ra	1.56635	1.98579	0.000697794	0.0374102
Ano5	-1.56486	2.96755	6.3254e-05	0.00623271
Mt1	1.53991	6.20232	6.51218e-13	7.25256e-10
Angptl7	1.52665	3.18899	0.000284362	0.0196047
Rasgef1c	1.50735	1.09167	0.00100108	0.0482992
Rgcc	1.50629	5.90085	4.51067e-17	1.08843e-13
Nrap	1.49577	9.53677	0.000342206	0.0225008
Alpk2	1.49476	5.60335	0.000992286	0.0481501
Clca1	1.48633	4.31064	9.10782e-06	0.00131863
Cx3cr1	-1.46206	2.96792	0.000685474	0.037031
Slc38a3	1.461	2.59484	0.000447891	0.027132
Apln	-1.44695	4.04489	4.45498e-05	0.00497339
Per1	1.43158	6.52003	1.44869e-08	6.16888e-06
Esrrg	1.41385	3.44266	0.000519412	0.0300802
Hif3a	1.41375	6.53283	3.86385e-06	0.000658127
Myl9	-1.41073	7.64809	1.20489e-14	1.93827e-11
Flnc	1.40688	10.2704	0.00010159	0.00907911
Klf9	1.40474	5.20793	6.10232e-07	0.000144835
Lsmem1	-1.39422	3.16276	9.47422e-05	0.00864882
2310057M21Rik	1.38382	4.75021	7.40998e-09	3.38437e-06
Myh3	1.38309	12.4619	1.75057e-06	0.000342496
Scn3a	1.37336	4.92555	2.11846e-06	0.000403566
Acer2	1.36217	3.33895	0.000264738	0.018697
Tnfrsf12a	1.36017	6.44326	2.56534e-12	2.65293e-09
Usp28	1.35669	8.01586	8.48755e-07	0.000186186
Cebpd	1.35512	5.1568	5.73351e-05	0.00592927
Sgk1	1.33611	6.60817	4.12223e-09	1.98939e-06
Ddit4	1.33301	5.51835	1.14083e-06	0.000242896
Frzb	-1.32062	3.51752	1.07765e-05	0.00150022
St3gal5	1.31988	6.77695	3.21842e-11	2.45243e-08
Hspb1	1.31141	8.7603	0.000731749	0.0386652
Btg2	1.29766	5.76031	8.063e-08	3.072e-05
Rcan1	1.29104	6.50112	3.33104e-13	4.0189e-10
Mlf1	-1.28575	8.44828	3.61315e-11	2.61556e-08
Agbl1	1.27893	2.93103	0.000379946	0.0240212
Pvalb	-1.26778	5.82363	7.22774e-06	0.0010788
Tdrp	-1.26466	3.08636	0.00024017	0.0174733
Myo18b	1.26376	8.50043	0.000231662	0.0169394
Musk	1.26103	5.39927	5.35647e-06	0.000852208
Fam78a	-1.26078	3.64347	1.3208e-05	0.00175436
G0s2	-1.24185	4.70384	0.000150188	0.0119474
Mt2	1.24005	6.23854	4.99889e-07	0.000125027
Cyr61	1.23625	6.75001	1.00862e-05	0.00143164
Tsc22d3	1.23494	7.05238	3.19687e-05	0.00376295
Trim63	1.22829	6.36145	0.000142434	0.0116853
Cryab	1.22704	8.68147	0.000317137	0.0215564
Tmem52	1.22628	4.04913	1.86003e-05	0.00234169
Tacc2	1.2245	7.66866	0.000147409	0.0119074
Otulin	1.22258	5.96749	1.76215e-13	2.31931e-10
A730046J19Rik	-1.2213	3.00433	0.00072201	0.0382903
B3galt2	-1.20725	5.83479	8.01806e-09	3.51774e-06
Gm4980	-1.19619	3.7755	1.67632e-05	0.00214777
Adh1	1.18673	6.22048	1.72804e-11	1.40054e-08
Gm6307	1.17982	3.81348	0.000492152	0.0294247
Synpo2	1.17742	7.66344	0.000852359	0.043105
Clic5	1.17302	5.91571	0.000428312	0.026165
Fbxl22	-1.17011	4.87617	5.30655e-07	0.000128711
Pdpk1	1.14419	7.95453	1.49259e-07	4.67037e-05
Chd7	1.14248	5.86483	2.49121e-06	0.000445281
Klhl30	1.13404	5.92864	4.54397e-05	0.00498391
Egln3	1.12604	6.36348	7.24955e-07	0.000161475
Ttc9	1.12316	5.3673	0.000684832	0.037031
Sfrp4	-1.12191	5.2223	4.74134e-05	0.00512277
Fam13a	1.11864	5.6159	5.00868e-07	0.000125027
Spock2	1.11829	5.16735	9.0457e-08	3.35804e-05
Mustn1	1.11686	8.62286	6.98893e-06	0.00107644
Myom3	1.09827	7.26028	1.25735e-07	4.55049e-05
Shisa3	1.0965	4.21104	6.31261e-05	0.00623271
Dnajb5	1.08419	6.04014	5.33408e-07	0.000128711
Dusp26	1.06448	4.94764	0.000328553	0.0219414
3425401B19Rik	1.06403	6.6716	0.000207554	0.0154101
Atp8a1	1.06247	5.77478	2.70816e-07	7.69035e-05
Asrgl1	1.05927	4.48044	1.06238e-05	0.00149332
Kcnc1	1.05735	5.65828	0.000155278	0.012152
Rrp12	1.05409	5.94507	0.000829119	0.0425673
Atoh8	1.0482	3.6667	0.000118724	0.0101709
Ttll7	1.04518	5.68177	0.000159407	0.0124081
C430049B03Rik	1.04092	6.71714	2.47861e-06	0.000445281
St8sia4	-1.03718	5.36491	4.99788e-08	2.00998e-05
Slc43a3	1.03073	5.89451	2.56161e-05	0.00311656
Dok7	1.02844	4.53144	0.000341676	0.0225008
Sesn1	1.01637	7.74941	0.000593753	0.0331906
Obscn	1.0154	8.32591	0.000391086	0.0245114
Cdh13	1.01341	6.9286	0.000344087	0.0225008
Gadl1	1.011	5.20595	4.87476e-05	0.00522791
Fam134b	1.00445	8.31675	9.58798e-05	0.00867593
Tiam2	0.998896	4.51352	4.50003e-05	0.00497339
Arhgap26	0.998398	4.93813	5.4994e-05	0.00576959
Mknk2	0.992113	8.38897	1.14273e-05	0.00156079
Adamts20	0.983087	5.32389	0.000117272	0.0101064
Sult1a1	0.968861	5.59284	0.000103553	0.00919781
Ank3	0.965448	7.33949	0.000994397	0.0481501
Hic1	-0.961655	5.28084	1.2908e-07	4.55049e-05
Tsc22d1	0.960319	8.8719	2.8359e-05	0.00339323
Kcnh2	-0.957347	4.02115	0.000752643	0.0394365
Tspan12	-0.955187	6.18772	1.89115e-09	1.01894e-06
Slc15a4	0.955046	4.02196	0.000247028	0.0177053
Npnt	0.949225	7.78927	0.000142858	0.0116853
Slc25a27	0.946079	3.95712	0.000327757	0.0219414
4833403I15Rik	0.943391	4.92633	7.73276e-05	0.00736545
Carns1	-0.937499	4.82924	1.13778e-05	0.00156079
Myot	0.936746	10.2624	0.000151255	0.0119665
Pqlc1	0.933899	5.02384	1.32007e-07	4.55049e-05
Dnaja4	0.933107	6.35832	0.000160588	0.0124331
Net1	0.931852	8.26543	5.74246e-06	0.000903688
Stim2	0.929822	6.95076	1.28297e-06	0.000261618
Errfi1	0.92779	5.6764	4.80847e-07	0.000124316
Pi4k2a	0.927022	5.39699	4.01293e-07	0.000105635
Dach1	-0.924877	4.3262	9.42555e-05	0.00864882
Trib1	0.9165	4.5596	5.94937e-05	0.00606514
Itga4	0.912107	5.99404	6.69572e-07	0.000156356
Usp2	0.911605	6.24617	0.000122028	0.0103925
Smtnl1	0.911256	7.01872	1.39652e-05	0.00183807
Fam214b	0.90973	5.16438	0.000319363	0.0216062
Grip2	-0.907374	5.14555	0.000307989	0.0210333
Phkg1	-0.903191	4.2239	0.000508425	0.0298016
C2cd2	0.901795	6.309	3.56642e-05	0.00406572
Ccrn4l	0.89998	4.16758	0.000243682	0.0176401
2010111I01Rik	0.890423	7.16281	2.85822e-07	7.80781e-05
Rbm38	0.889312	6.45674	0.000586402	0.0329067
5930412G12Rik	0.886825	4.22498	0.000754283	0.0394365
Rxrg	-0.886266	4.70319	7.38431e-05	0.00717517
Mex3b	-0.865601	4.07935	0.000702831	0.0374102
Bcl2l1	0.860463	5.28785	2.91542e-05	0.0034598
Lynx1	-0.860234	4.61126	8.50466e-05	0.0079439
Ccdc136	0.860194	5.3117	3.56051e-05	0.00406572
Dpep1	0.853161	5.52943	0.000134679	0.0113365
Adprhl1	0.853056	6.37784	0.000269712	0.0189557
Abracl	-0.846209	5.97965	2.35706e-06	0.000437507
Dync1li1	0.844532	6.3489	2.68117e-06	0.000473389
Prepl	0.832681	8.51941	0.000649253	0.0356056
Pcdh20	-0.831502	4.66513	0.000510869	0.029824
Hdc	0.830842	6.73005	7.54652e-05	0.00723567
Nfat5	0.82603	7.6842	0.000559745	0.0317804
Rab15	0.820599	5.53439	0.000700559	0.0374102
Pdlim1	0.819346	6.708	4.93254e-06	0.000802397
Tceal3	-0.819312	5.34202	0.000355282	0.0229633
Micall1	0.81537	6.62149	9.69955e-06	0.0013904
Tceal1	-0.813255	5.53427	0.000196187	0.0147937
Zw10	0.810052	5.51052	3.83794e-06	0.000658127
Gprc5c	-0.807021	4.8301	8.17778e-05	0.00768817
Usp54	0.806235	5.09331	0.000126367	0.0106991
Mmd	-0.805641	5.37505	1.64986e-05	0.00213274
Wfdc1	-0.804747	4.62946	0.000148041	0.0119074
Nfkbia	0.804454	5.83848	1.25333e-05	0.00168016
Hdac9	-0.80255	4.55064	0.00100415	0.0482992
Kctd12	-0.802315	7.61773	0.000990977	0.0481501
Tnni1	0.798252	9.24205	0.000437293	0.0266014
Phospho1	-0.797725	4.60793	0.000105386	0.00930352
Fam213b	-0.79758	5.59217	5.9066e-05	0.00606495
Gpd1	-0.797199	6.56858	2.66898e-07	7.69035e-05
2310015B20Rik	-0.797173	5.38222	7.21458e-06	0.0010788
Wdr1	0.787107	8.80738	0.000100769	0.00906171
Aimp2	0.785184	6.02507	2.47206e-05	0.00303309
Ahcy	0.76059	4.77543	0.000361835	0.0232281
Cab39	0.760059	8.02802	1.23626e-05	0.00167276
Anxa4	0.750796	6.36426	4.47372e-06	0.000744489
Klf13	0.749979	5.80549	0.000172794	0.013307
Mospd1	-0.748152	7.8216	5.23549e-05	0.00557349
F2r	0.747592	6.56734	2.6953e-05	0.00325188
Helb	0.739787	4.48775	0.000364193	0.0232281
Bche	-0.738817	6.05477	0.000227587	0.0167259
Ppat	-0.734686	5.76838	3.78633e-06	0.000658127
Osmr	0.733505	4.92754	0.000945559	0.0468829
Smim5	-0.732919	4.44793	0.000613672	0.0339113
Ldlrad3	0.720197	6.51101	0.000111707	0.0097427
Cystm1	0.715596	5.637	0.000109948	0.00964744
Usp25	0.708304	7.0983	0.000205536	0.0153389
Dhrs7c	-0.707671	6.97782	0.000246306	0.0177053
Mstn	-0.704933	6.01707	0.000139737	0.0116271
Uhrf1bp1l	0.701894	5.35932	7.45412e-05	0.00719471
Nup210	0.699534	5.73851	0.000904557	0.045004
Rab3gap2	0.698182	6.24498	4.5942e-05	0.00500112
Aff1	0.69714	5.8756	0.000345019	0.0225008
Fam131a	-0.695041	4.95855	0.000680157	0.03702
Qpct	-0.694843	5.58166	0.00025829	0.018331
Smarcal1	0.689275	5.56467	0.000493866	0.0294247
Klhl23	-0.679644	6.0221	0.000191894	0.0146098
Lmo2	-0.679532	4.73209	0.000767004	0.0398018
Ssh2	0.67931	5.77886	0.000328863	0.0219414
Ezh1	0.673174	5.36892	0.000331923	0.0220439
Ppme1	0.671264	6.06853	0.000147853	0.0119074
Myh10	0.661123	7.65014	0.000226078	0.0166998
Dot1l	0.658135	6.4245	0.00027873	0.0193084
Eif2ak1	0.65616	6.05459	3.98856e-06	0.000671469
2310002L09Rik	0.655791	6.72651	0.000524865	0.0301547
Exoc6	-0.65486	6.20337	0.000424842	0.0260837
Oaf	-0.643632	5.41308	0.000521875	0.0301024
Fscn1	-0.635907	6.54374	8.75826e-06	0.00128083
Bnip3	0.634363	6.29951	0.00027102	0.0189557
Rgl1	-0.631616	5.4692	0.00054376	0.0309943
Rgs2	-0.630954	6.23213	0.000603018	0.0335788
Cast	0.630363	7.39846	0.000642404	0.035364
Tcp11l2	0.629669	6.16483	0.00027455	0.0191102
Tmod4	-0.624497	7.05496	0.00042518	0.0260837
Jade1	-0.619975	5.4434	0.000153014	0.0120399
Anxa7	0.613377	6.76264	0.000539605	0.0308791
Ciz1	0.608425	5.70572	0.00035376	0.0229633
Ddah1	0.602425	6.19638	0.00101861	0.0488159
Lhfpl2	-0.599444	7.10815	0.00056508	0.0319579
Ifrd1	0.596054	6.31693	0.000369494	0.0234629
Bhlhb9	-0.591547	6.18752	0.000185541	0.0142131
Gabarapl1	0.589937	5.9069	0.000148906	0.0119108
Psmc4	0.587475	6.81821	0.000611698	0.0339113
Trp53inp1	0.586034	6.53552	0.000971462	0.0478396
Rab3gap1	0.585086	6.42138	0.000780683	0.0403669
