# Supplementary figures and images for: ”Som att tala till en vägg” Intensivvårdssjuksköterskans upplevelser av kommunikation med sederade patienter
Source: eLife journal article supplement (doi:10.7554/elife.26439), 2010-03-08

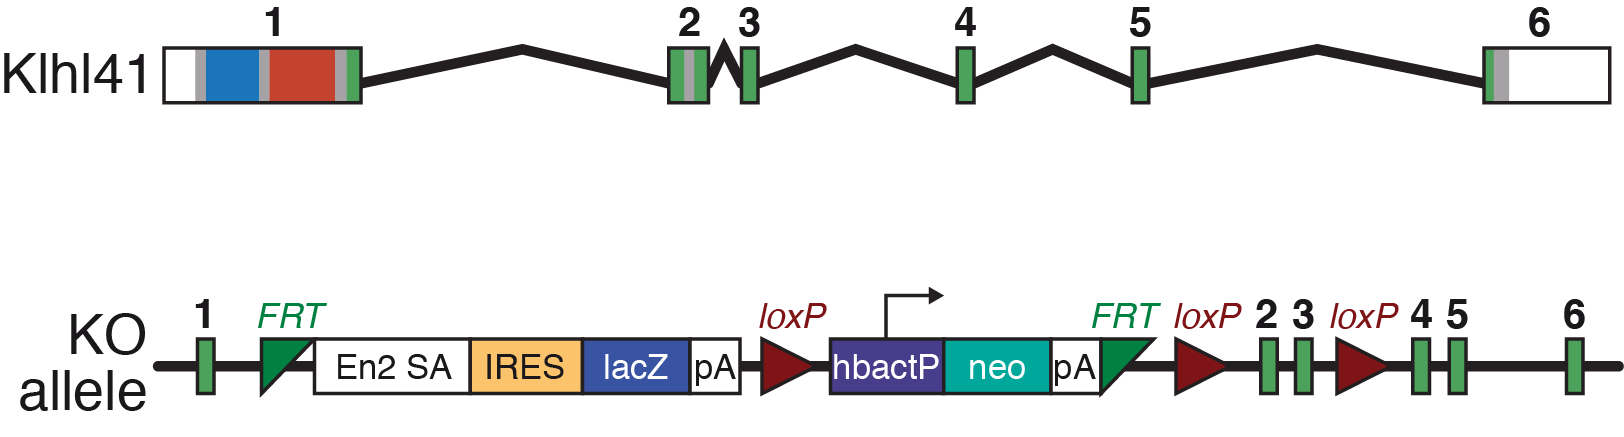

Supplement: supp [file elife-26439-supp-v1.zip › elife_poa_e26439_Figure_1_figure_supplement_1.tif]

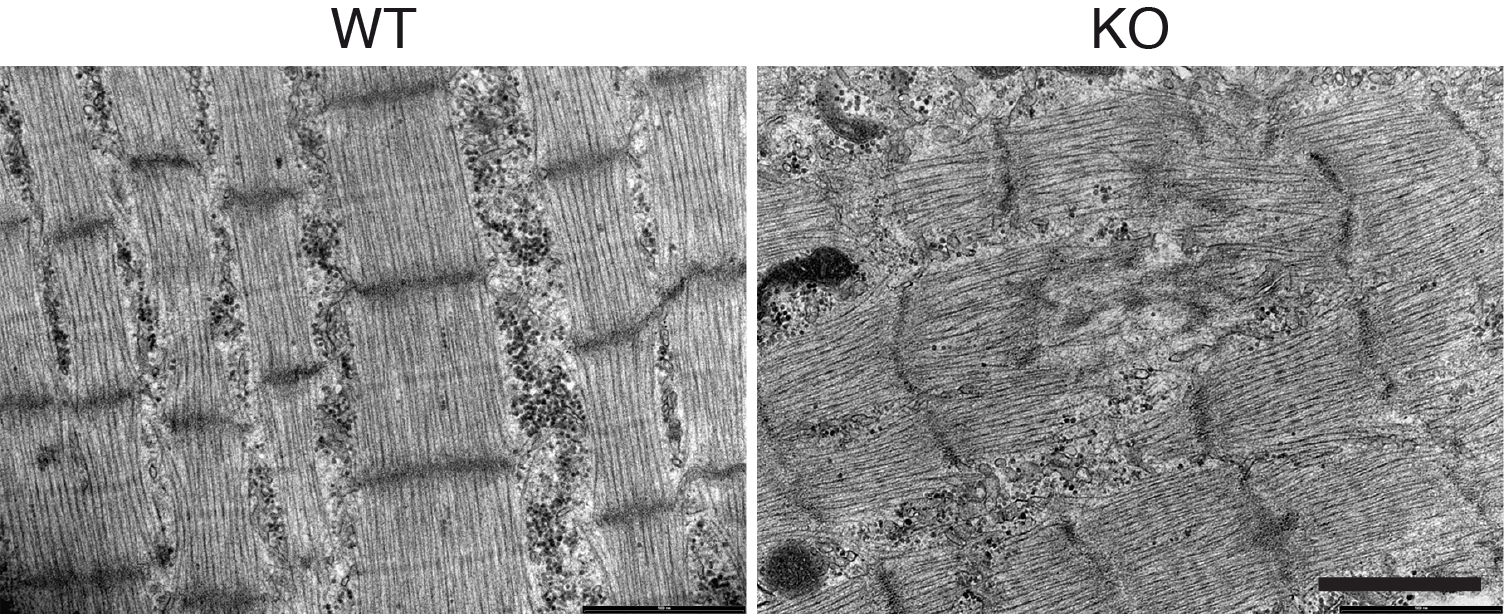

Supplement: supp [file elife-26439-supp-v1.zip › elife_poa_e26439_Figure_3_figure_supplement_2.tif]

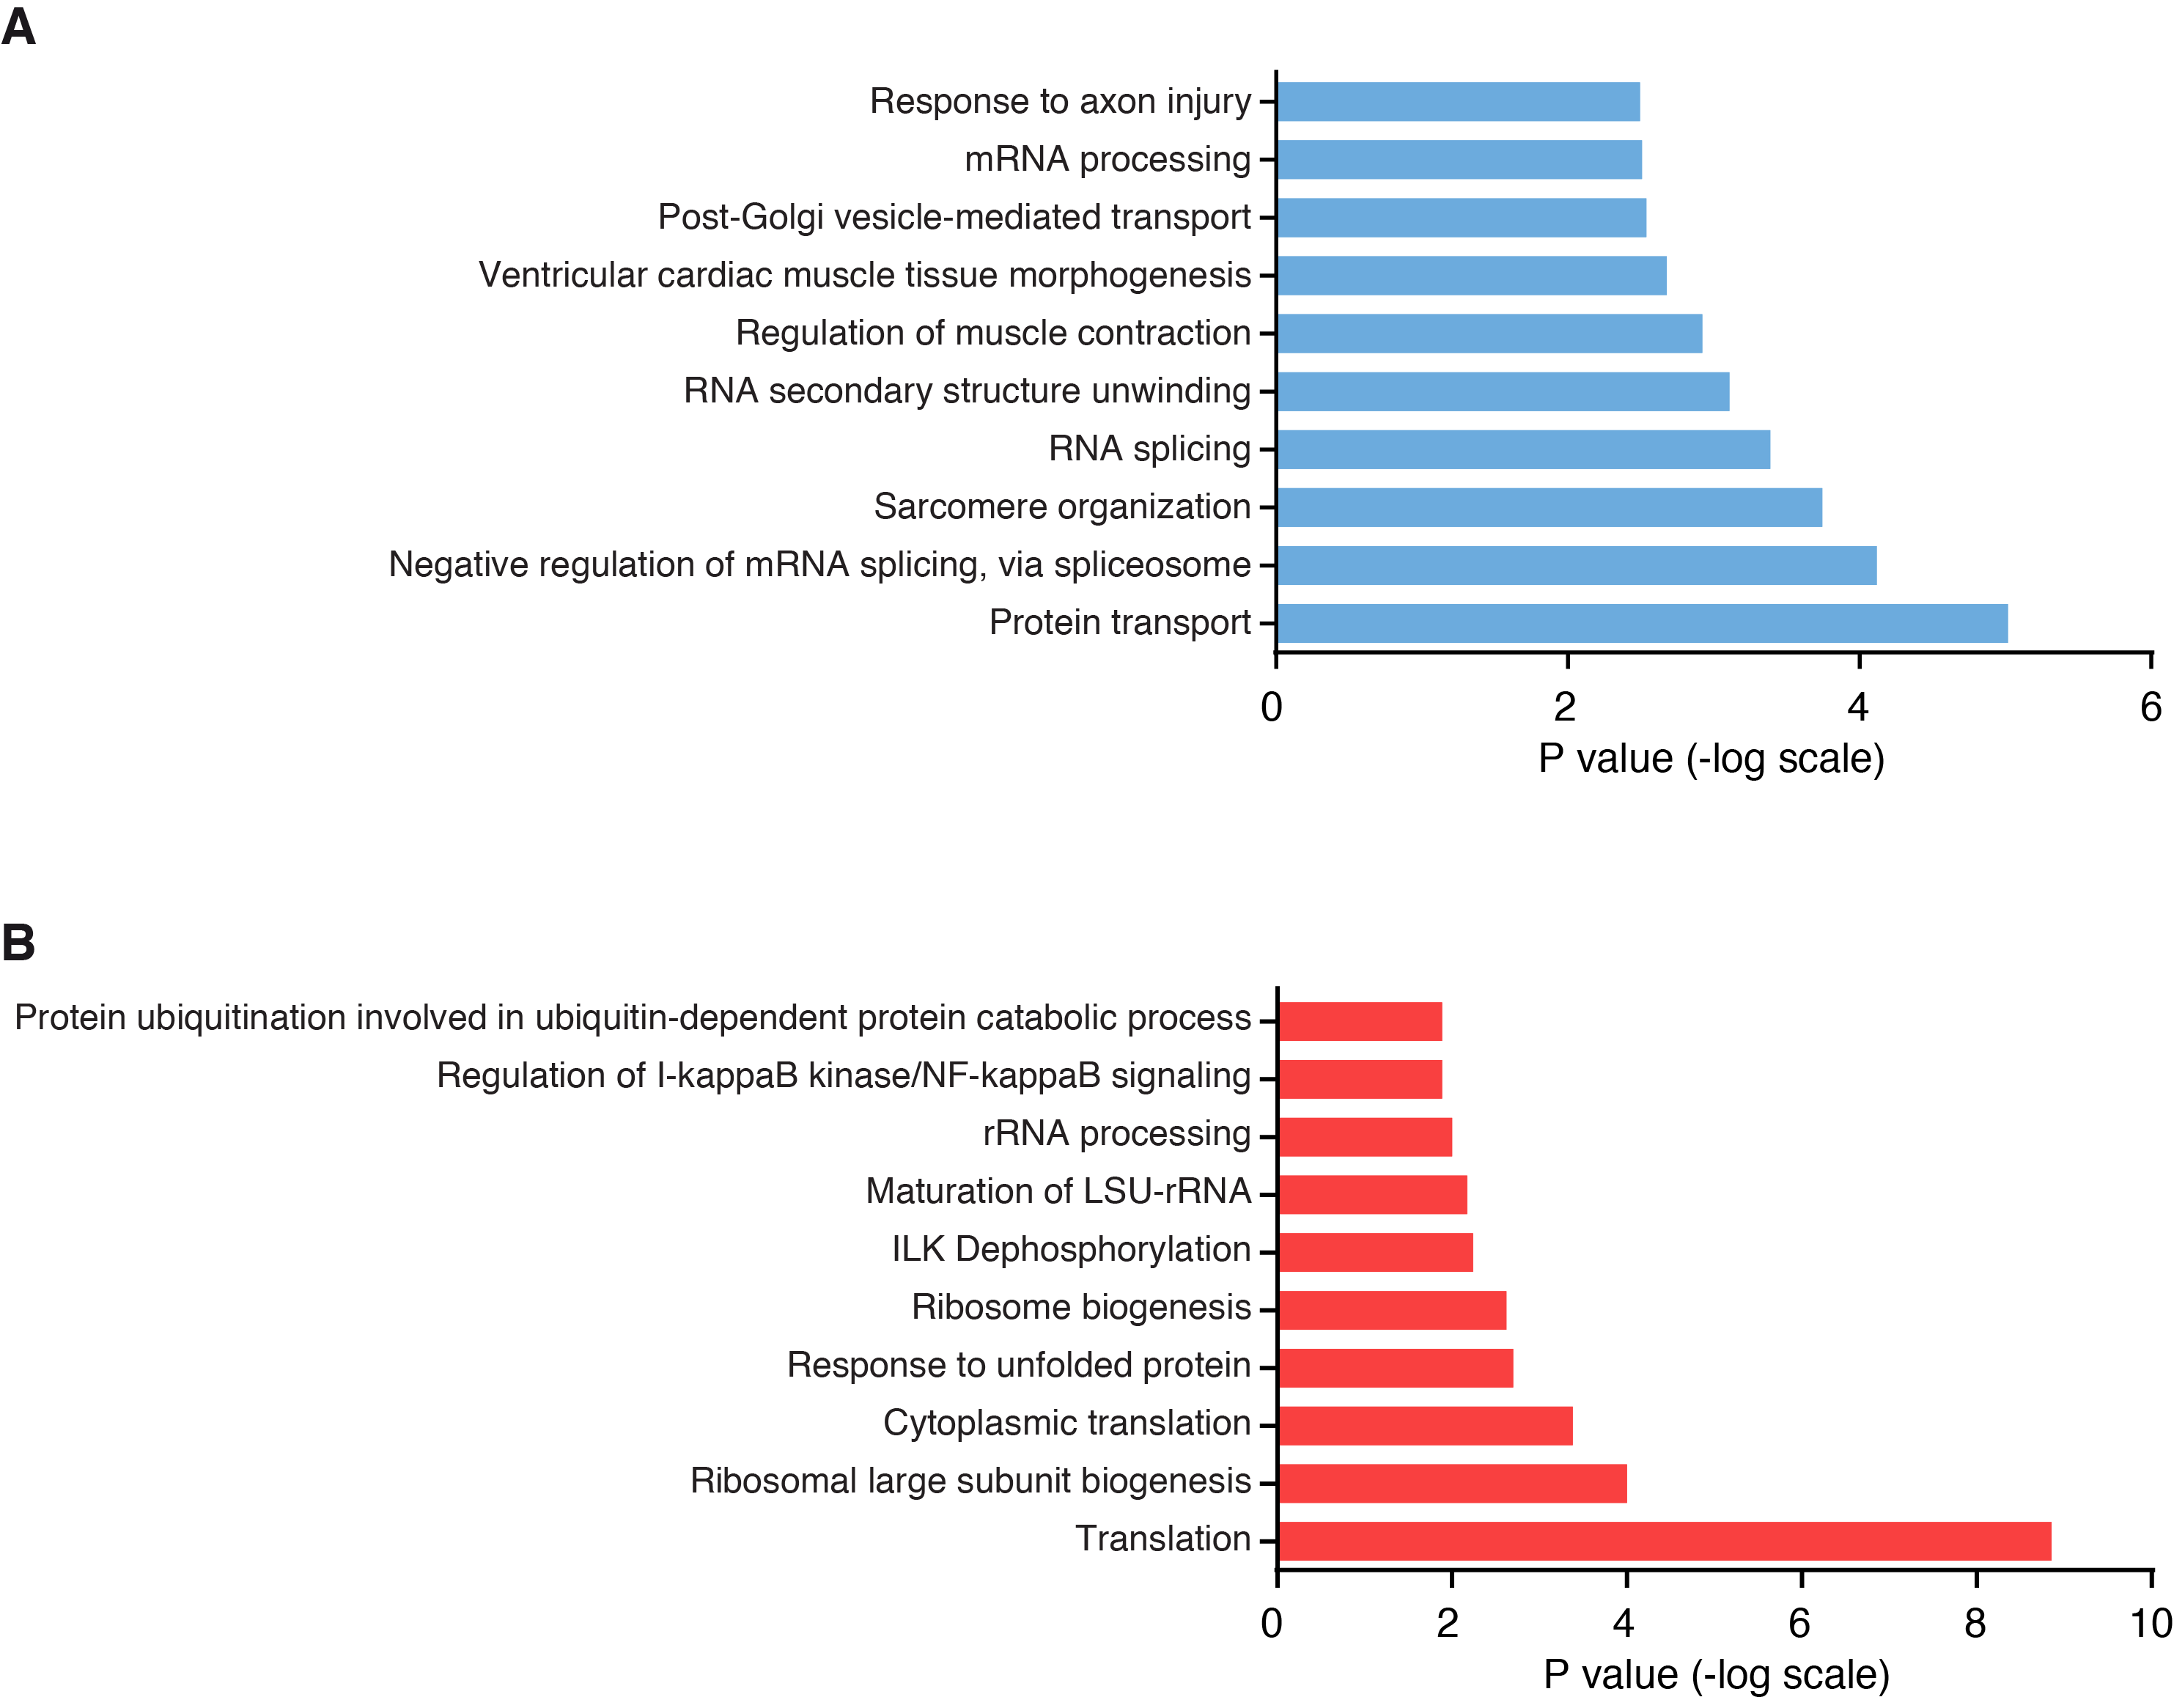

Supplement: supp [file elife-26439-supp-v1.zip › elife_poa_e26439_Figure_4_figure_supplement_1.tif]

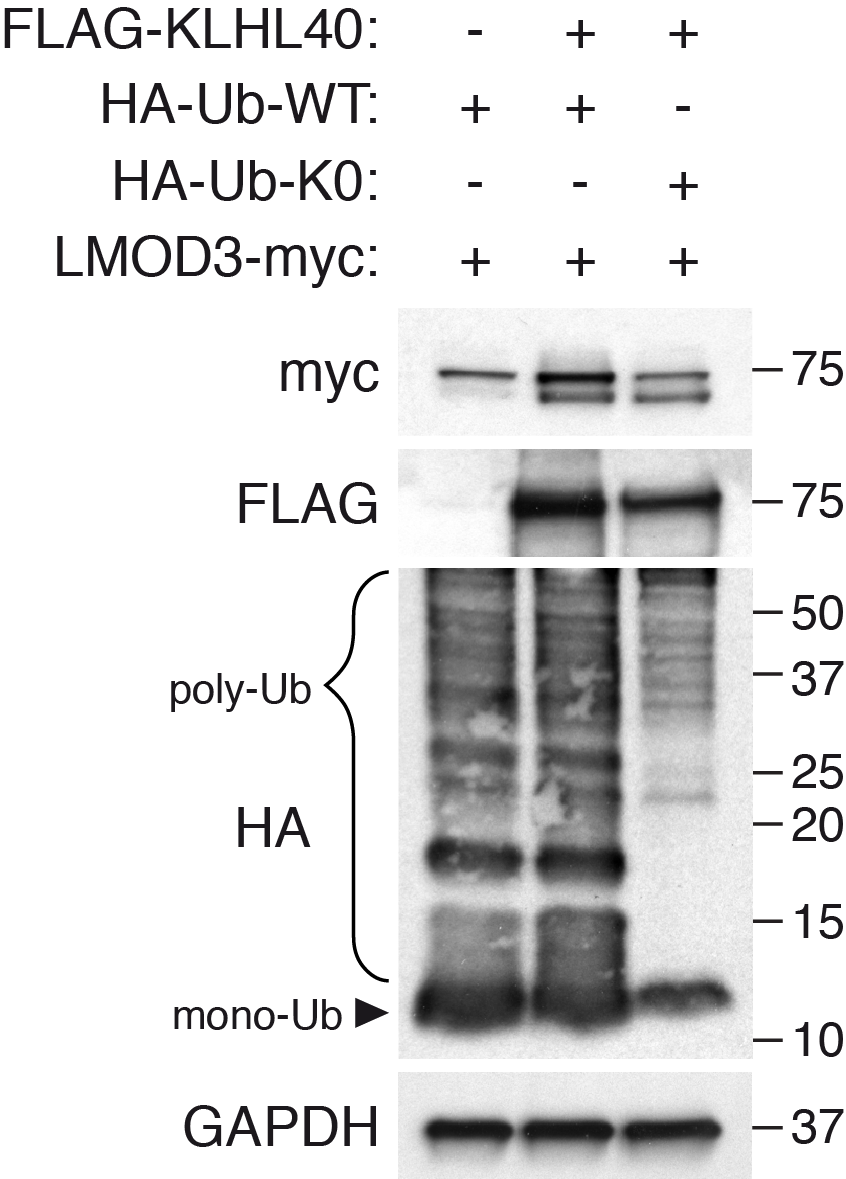

Supplement: supp [file elife-26439-supp-v1.zip › elife_poa_e26439_Figure_6_figure_supplement_1.tif]

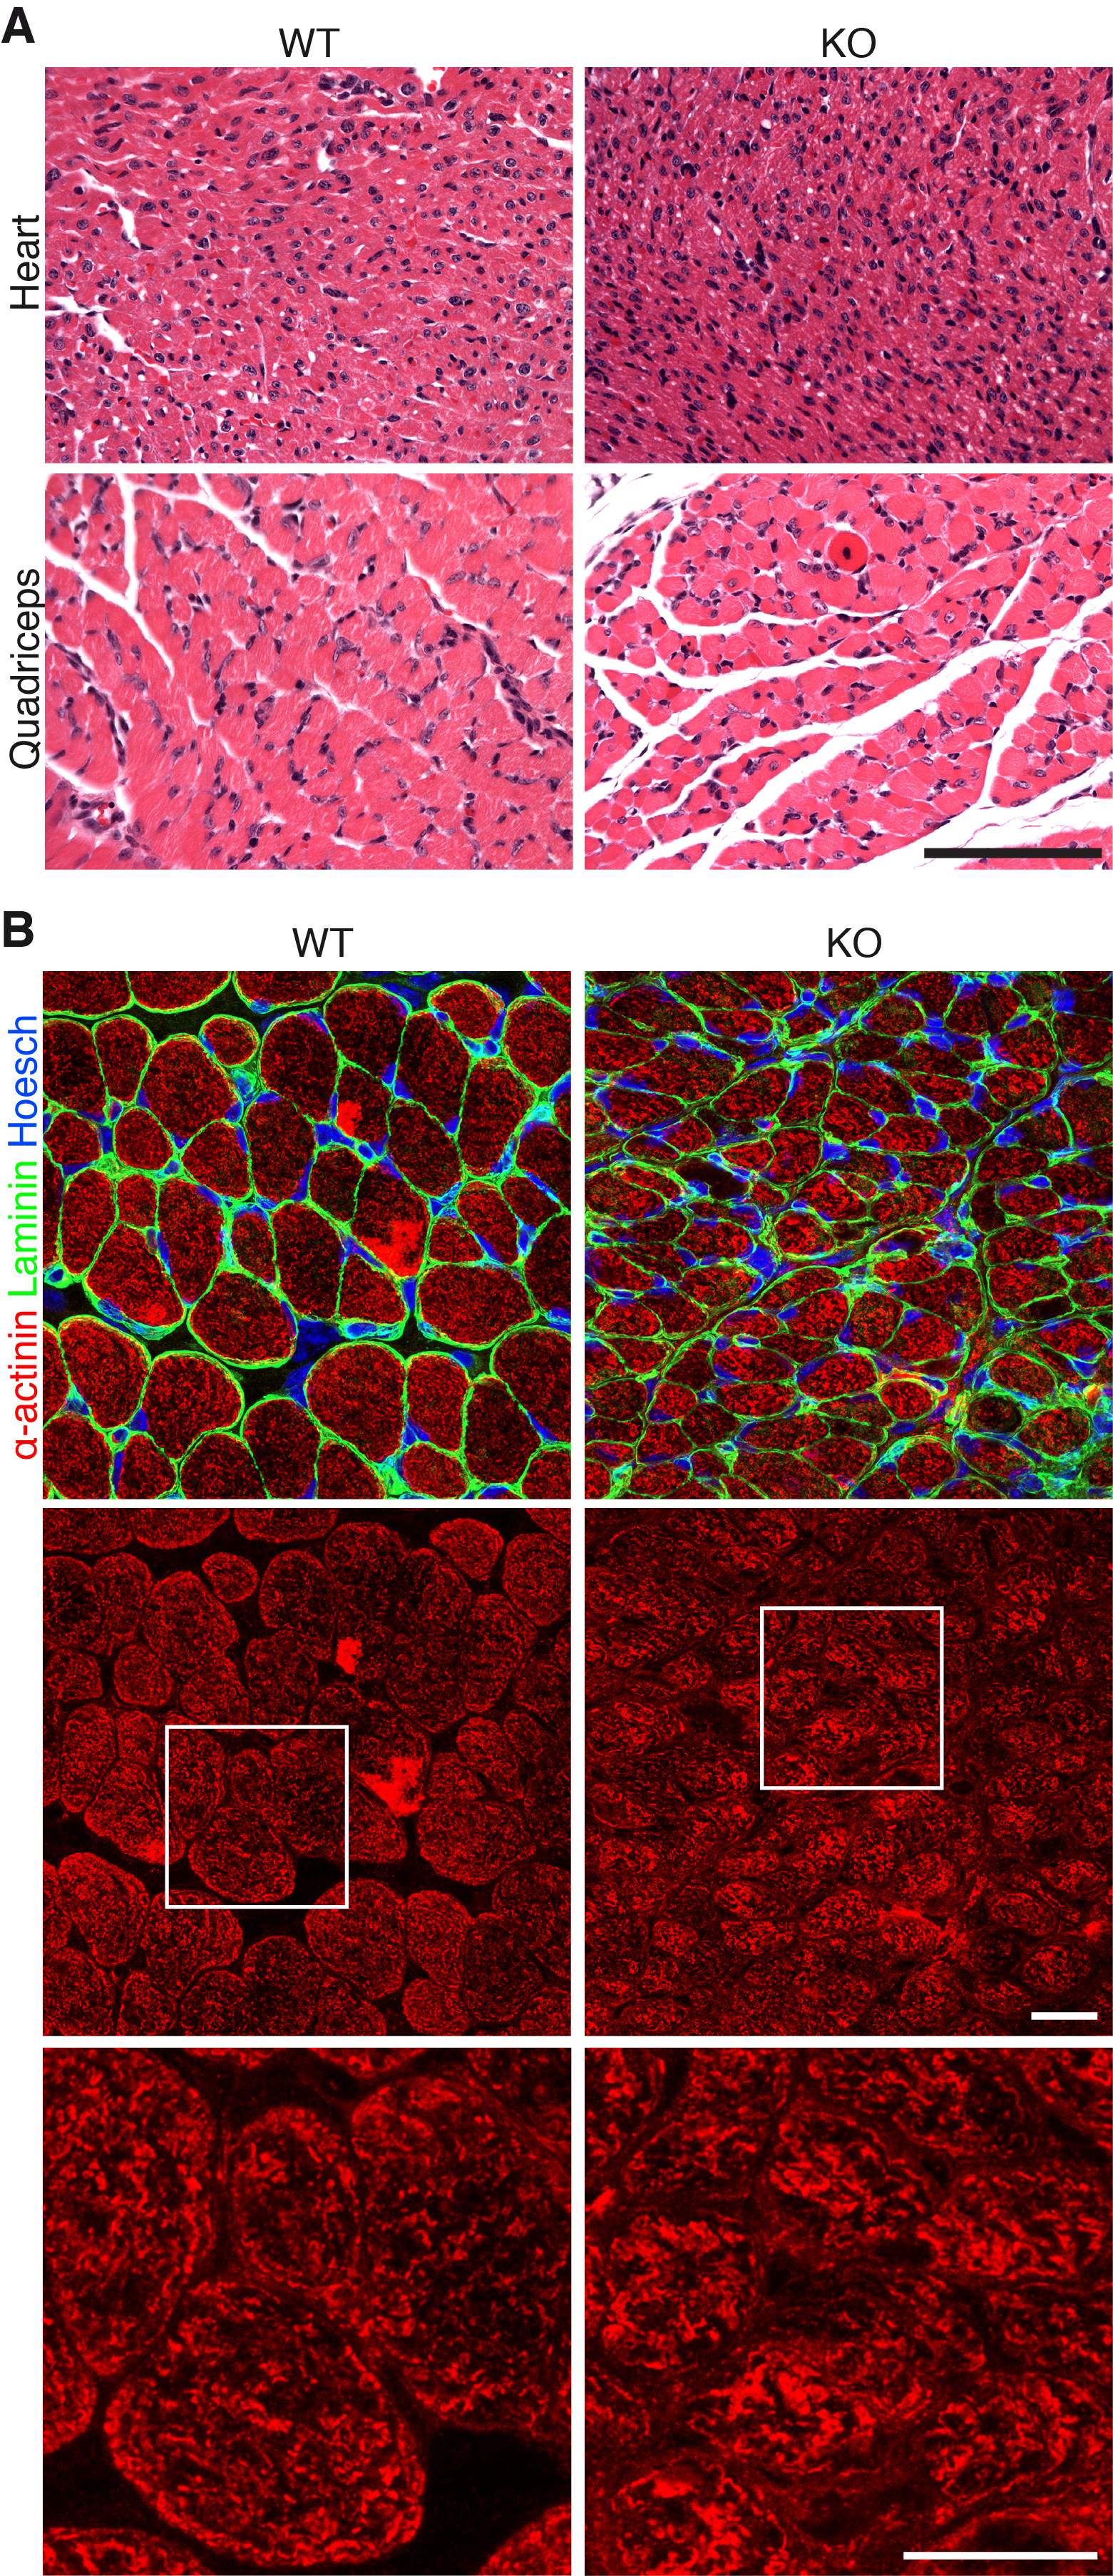

Supplement: supp [file elife-26439-supp-v1.zip › elife_poa_e26439_Figure_3_figure_supplement_1.tif]

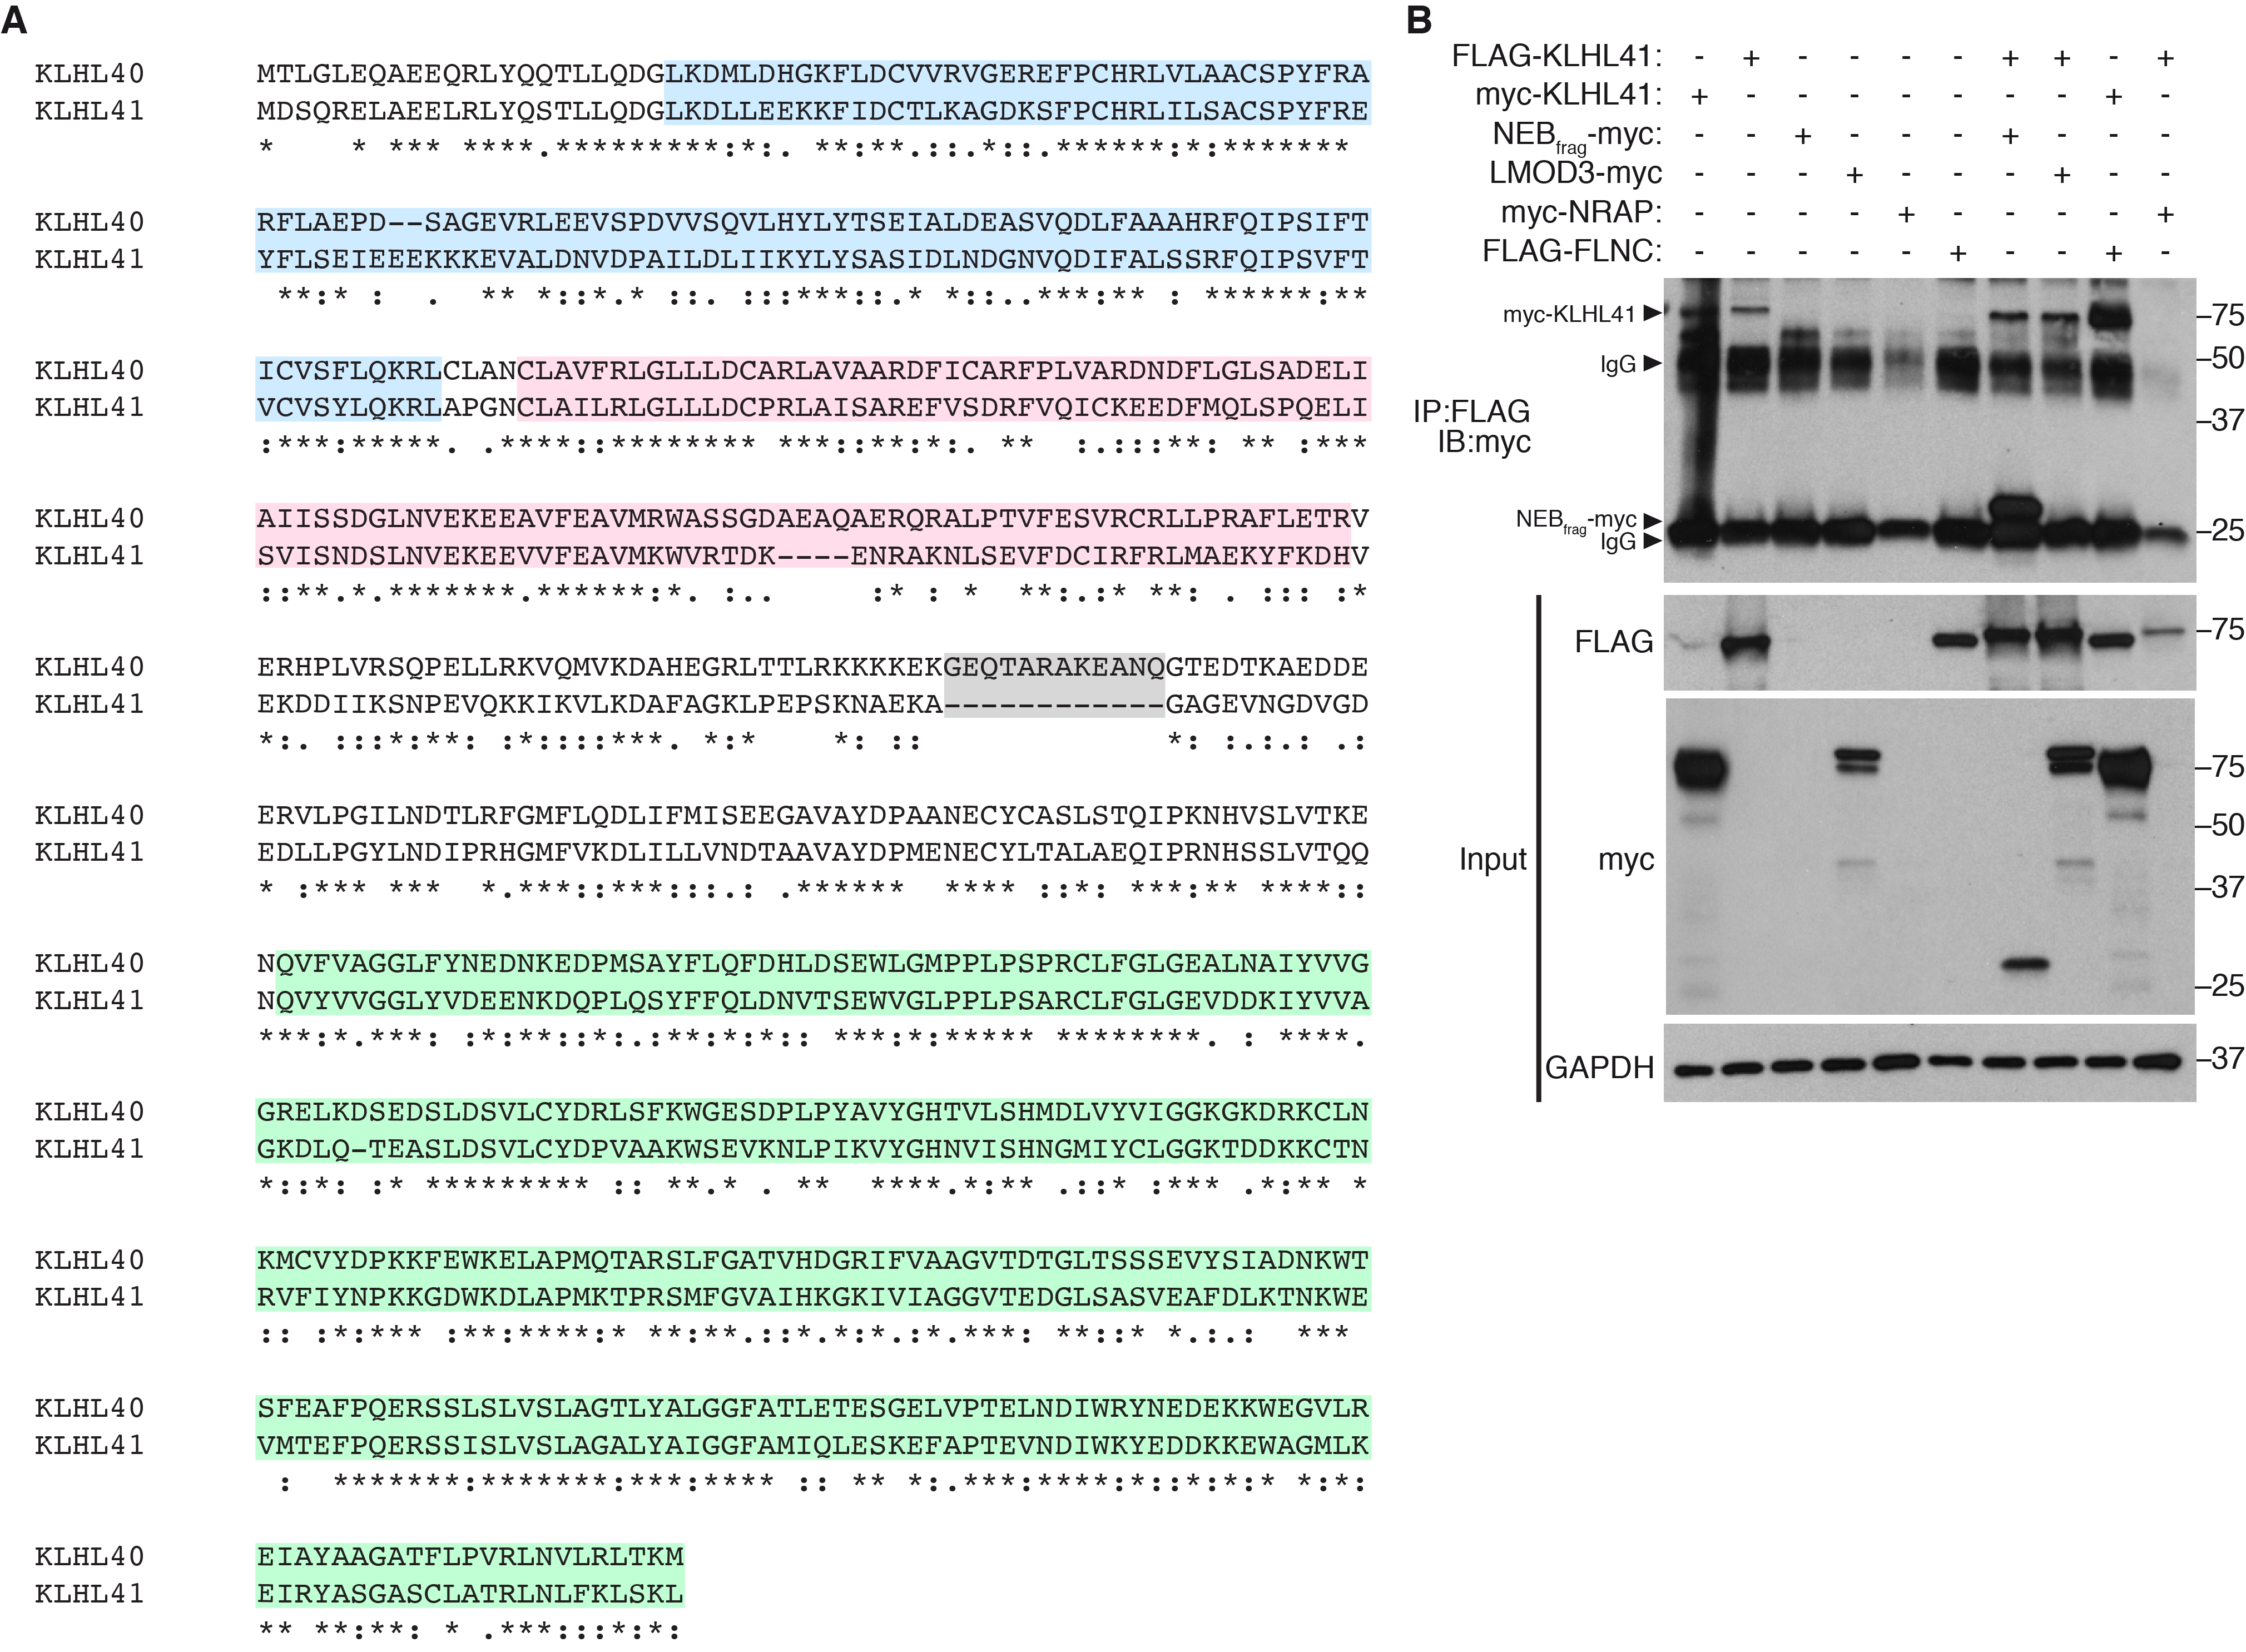

Supplement: supp [file elife-26439-supp-v1.zip › elife_poa_e26439_Figure_4_figure_supplement_3.tif]

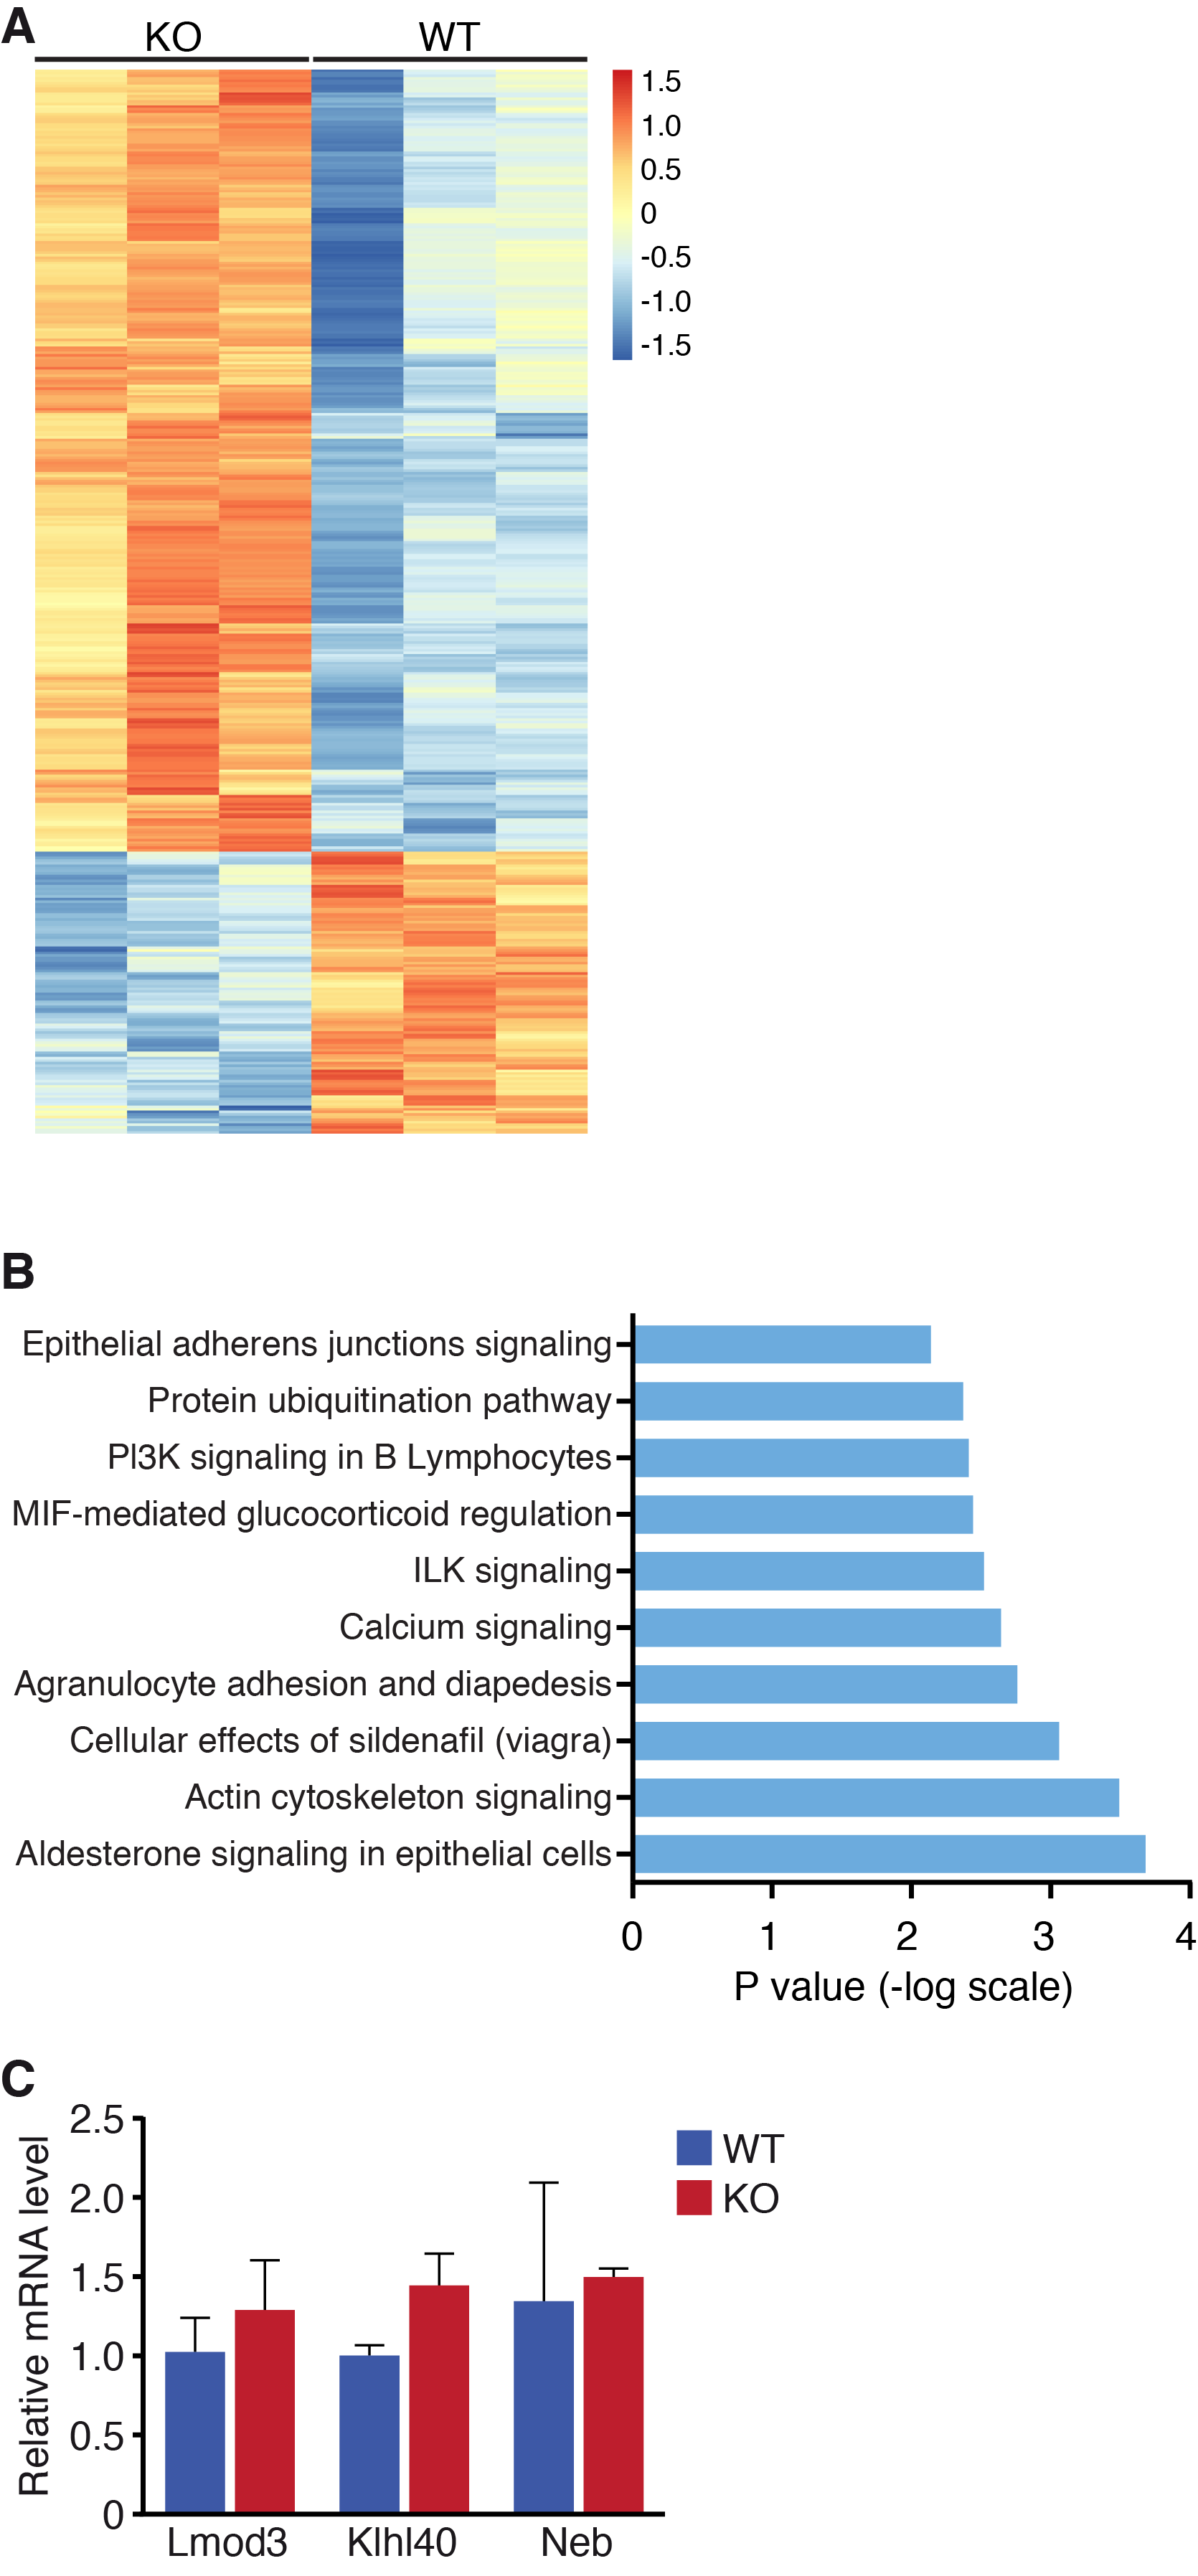

Supplement: supp [file elife-26439-supp-v1.zip › elife_poa_e26439_Figure_4_figure_supplement_2.tif]

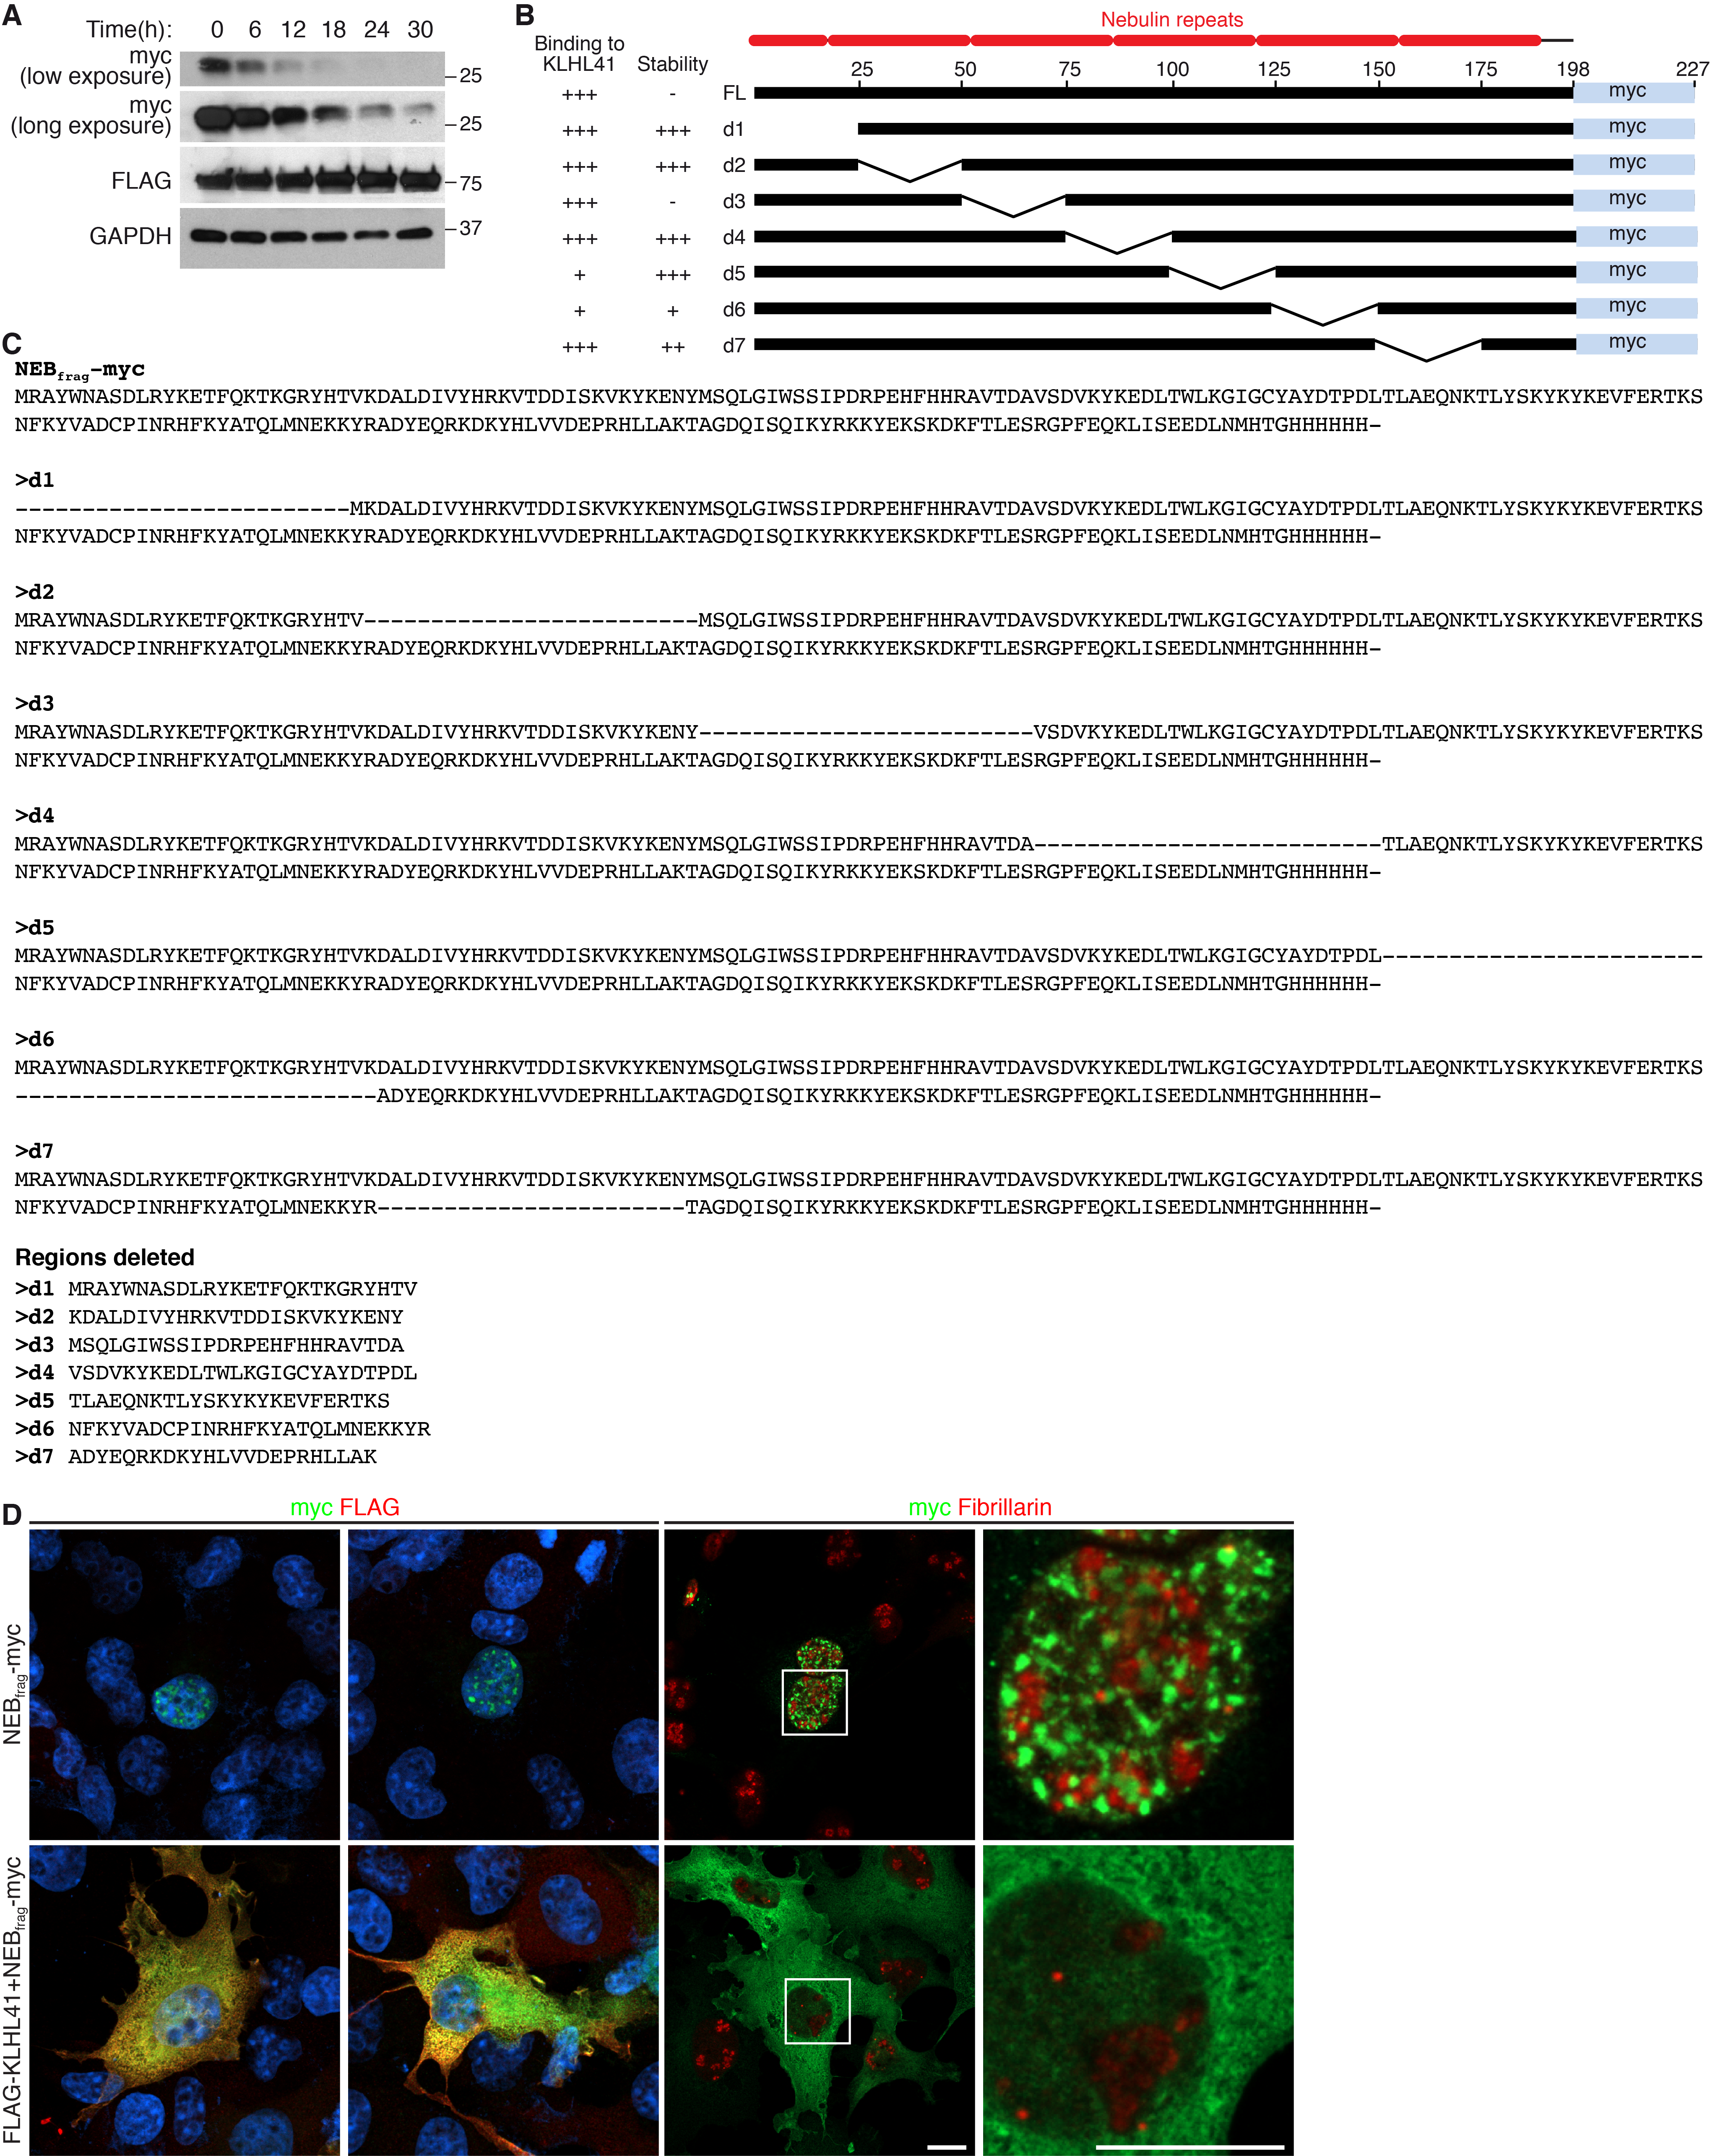

Supplement: supp [file elife-26439-supp-v1.zip › elife_poa_e26439_Figure_7_figure_supplement_1.tif]
